# Supplementary material for: Systems Biology Approach to Model the Life Cycle of Trypanosoma cruzi
Source: PLoS One. 2016 Jan 11;11(1):e0146947. doi: 10.1371/journal.pone.0146947 (PMC4709001; doi:10.1371/journal.pone.0146947)
Supplement: S4 Table — List of the 11,470 significant weights (at a significance level of 0.01) needed for the maintenance of the parasite’s steady states. The first column indicates the regulatory cluster IDs. The second column indicates the regulated cluster IDs. The third column lists the mean values of each cluster, averaged over the ensemble of 300 training sets. The fourth column lists the associated standard deviations. The last column lists the p-values (the probabilities of the location test). (XLSX) [file pone.0146947.s012.xlsx]

## Sheet: Hoja1
Regulatory cluster ID	Regulated cluster ID	Mean value	SD	p-value
1	1	0.0111218	0.0109065	0.00229436
1	2	0.0193042	0.00870426	2.05091e-47
1	21	-0.00775063	0.00846095	2.30087e-11
1	22	-0.00969602	0.00804705	6.52835e-24
1	33	0.0120638	0.00779798	0.000585986
1	35	-0.00868841	0.00804138	2.9169e-18
1	36	-0.0100616	0.00843929	3.18178e-26
1	37	-0.00942105	0.00824273	1.49898e-22
1	38	-0.00903144	0.00848826	6.0687e-19
1	43	0.0219861	0.00765438	2.65393e-78
1	44	0.0258865	0.00792493	2.51499e-103
1	47	0.015999	0.00821384	1.42158e-25
1	48	0.0158946	0.00804567	1.27186e-25
1	49	-0.0057931	0.00826292	0.00203066
1	50	-0.00576647	0.00826795	0.0024236
1	59	0.0177362	0.007868	2.31442e-41
1	60	0.0132304	0.0083906	5.16599e-08
1	61	0.022799	0.00793024	2.44635e-81
1	62	0.0207203	0.00848285	6.19095e-60
1	70	-0.00603143	0.00795741	0.000244274
1	71	-0.00735099	0.0086161	4.68705e-09
1	72	-0.0079966	0.00739638	9.44104e-16
1	84	0.01784	0.00783561	1.81516e-42
1	85	0.016887	0.00780915	8.72577e-35
1	86	-0.0115683	0.00765097	4.09641e-43
1	87	-0.0123209	0.00786223	1.02075e-47
1	96	-0.00831559	0.00800409	6.55529e-16
1	97	-0.00827929	0.00860091	5.60715e-14
1	103	-0.00567462	0.00786819	0.00288836
1	108	0.0168427	0.00885198	1.71706e-28
1	109	0.0157603	0.00719135	2.8284e-29
1	126	0.0198231	0.00787322	1.48481e-58
1	127	0.0128675	0.00822973	1.27469e-06
1	153	-0.00795019	0.00839683	1.31466e-12
1	163	-0.00557375	0.00849007	0.00919206
1	176	-0.00588057	0.00830295	0.00119043
1	181	0.0172877	0.00811632	5.42381e-36
1	182	0.0162242	0.0076576	2.54703e-30
1	187	0.0154285	0.00694869	7.08537e-28
1	192	0.015353	0.00771346	3.91475e-23
1	199	0.0127308	0.0078305	1.6638e-06
1	203	0.0139464	0.00796536	1.29028e-12
1	208	-0.010044	0.00842318	5.5976e-25
1	209	-0.0094497	0.00810983	2.43023e-23
1	231	0.0131875	0.00757148	3.83189e-09
1	235	-0.00619951	0.00780516	4.54976e-05
1	236	-0.00693709	0.00830777	1.34012e-07
1	238	0.0119566	0.00825096	0.00218325
1	243	-0.00648191	0.0086245	2.66233e-05
1	247	0.0121604	0.00818604	0.000495074
1	265	-0.00782571	0.00782296	2.50497e-13
1	267	0.013443	0.00853758	8.82865e-09
1	273	0.0119677	0.00810469	0.00172629
1	277	-0.0104135	0.00820283	4.72899e-30
1	279	0.0229627	0.00754696	3.3828e-87
1	280	0.0178711	0.00858473	1.81629e-37
1	285	-0.00632348	0.00783184	3.00042e-07
1	287	-0.00966387	0.00844818	9.78704e-23
1	290	-0.00833607	0.00765278	3.11809e-17
1	295	0.0252312	0.00770732	1.07001e-101
1	296	0.0241763	0.00740387	3.3631e-98
1	301	-0.0065664	0.00827436	4.65148e-06
1	303	-0.0119867	0.00810818	4.86318e-43
1	305	0.0290053	0.0077368	1.09791e-125
1	306	0.0265768	0.00783983	5.33614e-50
1	309	-0.0118601	0.00837792	4.22253e-40
1	313	-0.00740833	0.00743533	9.50549e-12
1	314	-0.00582502	0.00834822	0.00181171
1	318	0.0134152	0.00834748	5.92322e-09
1	321	-0.00584909	0.00868803	0.00222809
1	329	0.0250048	0.00844107	4.16272e-91
1	330	0.0206616	0.0078333	9.20968e-66
1	331	0.016655	0.00814506	7.11856e-31
1	334	0.0165551	0.00729817	1.72555e-35
1	336	0.0149497	0.00782813	1.16712e-19
1	338	-0.00939361	0.00756151	5.02052e-24
1	340	-0.0169971	0.00162485	1.78666e-269
2	1	0.0194199	0.00807668	2.51547e-58
2	21	-0.00651703	0.00809684	0.000167871
2	22	-0.00808831	0.00791108	4.95614e-11
2	33	0.0113721	0.00767735	0.00025863
2	35	-0.00727986	0.00800961	8.78576e-07
2	36	-0.00753807	0.00874097	5.38084e-07
2	37	-0.00814437	0.00767982	7.02246e-12
2	38	-0.00858882	0.00771688	1.38553e-14
2	43	0.0164797	0.00798438	2.65185e-35
2	44	0.0204833	0.00762204	1.47195e-71
2	47	0.0130623	0.00883219	9.86575e-10
2	48	0.0128986	0.00768261	9.86347e-11
2	49	-0.00619828	0.00797444	0.0056549
2	50	-0.00644507	0.00755374	0.000628563
2	59	0.0137878	0.00740801	2.48148e-17
2	61	0.0188173	0.00766493	9.55518e-50
2	62	0.0168578	0.00751946	8.31802e-42
2	71	-0.00633724	0.00787713	0.00209407
2	72	-0.00700391	0.00806362	1.42341e-05
2	84	0.0157241	0.00728901	1.20145e-33
2	85	0.0146779	0.00820908	1.51723e-20
2	86	-0.0105944	0.00794693	3.85225e-28
2	87	-0.0117617	0.00792743	1.45789e-37
2	96	-0.00803096	0.00743785	8.42579e-12
2	97	-0.00785555	0.00835084	3.9345e-09
2	103	-0.00629105	0.00732357	0.00148834
2	108	0.0136983	0.00841988	3.70761e-14
2	109	0.0136157	0.00784999	1.10917e-14
2	126	0.0165839	0.00784836	6.06625e-33
2	153	-0.00701383	0.0083593	2.44214e-05
2	181	0.0150943	0.00755692	1.04975e-26
2	182	0.0137821	0.00804166	3.59509e-15
2	187	0.0120506	0.00735098	2.32751e-08
2	192	0.0128272	0.00768175	3.91594e-10
2	199	0.0115067	0.00753233	0.000247941
2	203	0.0121028	0.0076356	1.11162e-06
2	208	-0.0114144	0.00813181	2.27289e-29
2	209	-0.00956942	0.00830462	4.15033e-19
2	231	0.0117	0.00761516	5.42639e-05
2	235	-0.00655117	0.00785425	0.000431165
2	236	-0.00666304	0.0080174	0.000150388
2	243	-0.00720729	0.00770806	7.71241e-07
2	265	-0.00639252	0.00760245	0.00100551
2	267	0.0114071	0.00775739	0.000768356
2	277	-0.00952382	0.0079475	3.66575e-20
2	279	0.0167996	0.00773734	1.20783e-39
2	280	0.0142292	0.007243	2.26938e-21
2	287	-0.00936514	0.00811085	6.96765e-18
2	290	-0.00700159	0.00780735	8.0266e-06
2	295	0.0209882	0.00814639	9.07551e-44
2	296	0.0206007	0.0077339	2.90178e-71
2	303	-0.0109486	0.00786907	2.24862e-31
2	305	0.0242476	0.0080177	3.67604e-95
2	306	0.0224288	0.00738755	8.24582e-50
2	309	-0.011514	0.00764147	1.59643e-37
2	313	-0.00841213	0.00806045	1.49417e-12
2	318	0.0120023	0.00771479	3.88729e-06
2	329	0.0219675	0.00758469	8.77533e-84
2	330	0.0191445	0.00798117	3.87565e-41
2	331	0.0121116	0.00752336	7.20863e-07
2	334	0.0142632	0.00665272	1.00705e-24
2	336	0.0139887	0.00737221	5.95625e-19
2	338	-0.0104053	0.00723673	7.36644e-27
2	340	-0.0130253	0.0015818	4.90909e-91
3	118	0.0147798	0.00708518	9.69508e-25
3	119	0.0120013	0.00735111	1.40238e-06
3	167	0.0118921	0.00683194	4.83826e-07
3	168	0.0117797	0.00765785	1.70118e-05
3	189	0.0110247	0.00726576	0.00441323
3	205	0.0146484	0.00697902	1.01156e-26
3	206	0.0129648	0.00691859	1.63259e-13
3	240	0.0110647	0.00693186	0.00224795
3	249	0.0110983	0.00778855	0.00276802
3	251	0.0139259	0.00720335	1.30631e-19
3	266	-0.00674979	0.00760075	9.53579e-05
3	279	-0.00809477	0.00677821	9.958e-14
3	280	-0.00735066	0.00731135	6.54971e-07
3	291	0.017281	0.00707583	9.6035e-38
3	292	0.0188054	0.00668842	1.90943e-68
3	308	0.0130265	0.00764392	2.52066e-12
3	314	-0.00728339	0.0071064	7.30124e-09
3	319	-0.00876371	0.00701303	3.3637e-18
3	323	0.0155729	0.00736494	2.58836e-32
3	331	-0.00986123	0.00704102	7.26884e-25
3	332	-0.00771071	0.0068505	7.01405e-11
3	336	0.0182653	0.0075085	1.62368e-41
3	337	-0.00700831	0.00678895	5.29267e-08
3	339	0.0156236	0.00752241	1.00346e-31
4	118	0.0140163	0.0066889	4.45067e-27
4	119	0.0104694	0.00660154	0.00377704
4	168	0.0105133	0.00735767	0.000933671
4	205	0.0117652	0.00776621	2.52731e-08
4	206	0.011241	0.00632489	7.1474e-07
4	251	0.0119297	0.00705815	8.83159e-10
4	279	-0.00693081	0.0069647	0.00035697
4	280	-0.00660863	0.00758112	0.00837631
4	291	0.015163	0.00702204	1.93609e-31
4	292	0.0145958	0.00720923	1.06798e-26
4	308	0.0111364	0.00703951	2.59518e-06
4	319	-0.00755975	0.00734983	1.26065e-07
4	323	0.0135243	0.00754753	9.69113e-19
4	331	-0.00866559	0.00735289	1.10587e-13
4	332	-0.00723399	0.00702154	3.53165e-06
4	336	0.0150479	0.0067746	4.19298e-36
4	337	-0.0076294	0.00632433	1.60257e-08
4	339	0.0130666	0.00658198	2.7927e-19
5	194	-0.00625951	0.00714874	0.00231333
5	266	-0.0063183	0.00780292	0.00154018
5	273	0.0121069	0.00764884	6.02912e-07
5	302	-0.00681939	0.00742052	3.19027e-05
5	308	0.0114993	0.00727514	3.63787e-05
5	314	-0.00821278	0.00709046	3.39224e-13
5	332	-0.00850433	0.00793861	1.80029e-16
5	334	0.0149256	0.00714279	8.35102e-26
5	336	0.0162558	0.00724238	4.98409e-34
5	339	0.0135395	0.00746095	2.47172e-17
5	340	-0.00845248	0.00148074	4.89513e-51
6	332	-0.00626374	0.00717745	7.28718e-08
6	334	0.015359	0.00665837	4.39799e-25
6	336	0.0158076	0.00715177	6.09079e-26
6	339	0.014484	0.00691163	5.4929e-18
6	340	-0.0133645	0.00143086	3.05707e-51
7	8	0.0125524	0.00820954	9.41516e-09
7	133	0.0131616	0.00744414	5.51796e-14
7	134	0.0133238	0.00763268	1.72342e-14
7	147	0.0108602	0.00739344	0.00645592
7	148	0.0132322	0.00752054	3.18069e-14
7	151	0.011958	0.00756884	7.55575e-07
7	152	0.0116001	0.00728258	1.42915e-05
7	176	0.0154073	0.00740529	7.08938e-28
7	177	0.0156874	0.00749764	2.58076e-33
7	187	-0.00683867	0.00731581	5.70002e-05
7	194	0.0109002	0.00722335	0.00480036
7	195	0.0131738	0.00782848	5.52811e-13
7	214	0.019867	0.00794137	1.17535e-43
7	215	0.0180882	0.00706744	2.01044e-58
7	217	0.0140778	0.0078455	4.49977e-19
7	218	0.0119413	0.00766353	1.1976e-06
7	231	-0.00623475	0.00788234	0.00902909
7	247	-0.00841114	0.00764855	2.16395e-13
7	248	-0.00704828	0.00743159	9.83616e-06
7	257	0.0139399	0.00721387	9.89151e-20
7	259	0.015103	0.00755646	1.39467e-27
7	260	0.0185561	0.00761188	5.4889e-57
7	273	-0.00950656	0.00733777	1.89773e-21
7	274	-0.00754839	0.00736732	0.00229436
7	289	-0.00768866	0.00751586	1.01509e-08
7	290	0.0120183	0.00747676	2.89721e-07
7	292	0.0123252	0.00791761	4.17537e-08
7	293	0.0143677	0.00706394	9.75592e-25
7	294	0.0133155	0.00737018	2.90558e-15
7	296	-0.00736653	0.00687922	3.07358e-07
7	302	0.0123888	0.00763043	6.55789e-09
7	323	0.0107858	0.00714585	0.00951414
7	326	0.0222897	0.00747998	5.67121e-49
7	327	0.0179459	0.00728131	6.13162e-55
7	328	0.0144504	0.00753826	5.50677e-23
7	330	-0.00739971	0.00772924	5.95998e-07
7	332	0.0146013	0.00689712	9.81724e-28
7	334	-0.0141022	0.00755035	2.22265e-42
7	335	-0.00813371	0.00786265	1.76546e-10
7	336	-0.00622347	0.00776313	0.00711235
7	340	-0.00706462	0.00156598	3.11811e-60
8	7	0.0127645	0.00745726	2.69136e-08
8	59	-0.00578643	0.00797906	0.00660931
8	133	0.0135983	0.00782484	3.06863e-12
8	134	0.0143111	0.00780202	7.04404e-17
8	143	0.0119407	0.00783183	0.000276256
8	147	0.0118954	0.00715277	7.13351e-05
8	148	0.0141525	0.00767241	9.59507e-16
8	151	0.0122946	0.00735136	3.84305e-06
8	152	0.0123056	0.00837091	3.65822e-05
8	176	0.0163482	0.00796568	2.40025e-27
8	177	0.0170838	0.00754899	9.54639e-33
8	187	-0.00622545	0.00772054	0.000214776
8	188	-0.00577248	0.00776717	0.00596659
8	194	0.0123344	0.00775124	7.29477e-06
8	195	0.0123557	0.00775042	5.91835e-06
8	214	0.0213291	0.00720637	1.49237e-48
8	215	0.0187435	0.00752736	1.02782e-54
8	217	0.0159631	0.00783368	5.13671e-29
8	218	0.0126578	0.00732217	5.81255e-08
8	231	-0.00654749	0.00823054	7.2936e-06
8	247	-0.0089144	0.00775164	2.35717e-19
8	248	-0.00707238	0.0082307	2.70584e-07
8	249	0.0121058	0.00786029	2.5952e-05
8	253	-0.00592802	0.00752043	0.00160549
8	257	0.0143744	0.00747948	1.62776e-18
8	259	0.0160969	0.00800023	2.66991e-26
8	260	0.0197957	0.00780959	1.42657e-43
8	273	-0.00851232	0.00807444	1.68663e-15
8	274	-0.00626654	0.00727392	6.48745e-05
8	289	-0.00745663	0.00787655	1.17526e-10
8	290	0.0148725	0.00768428	9.1495e-21
8	291	0.0135489	0.00775541	4.08578e-12
8	292	0.0157887	0.00782194	3.72596e-27
8	293	0.0168822	0.00705502	2.19432e-42
8	294	0.015728	0.00762232	5.0027e-27
8	296	-0.00740305	0.00715839	5.48871e-11
8	302	0.0119455	0.00785894	0.000245499
8	323	0.013129	0.00764272	6.26445e-10
8	326	0.0249726	0.00717614	7.5556e-109
8	327	0.0199548	0.00823303	2.25963e-40
8	328	0.0170552	0.00737058	7.53064e-34
8	330	-0.00588853	0.00776956	0.00909413
8	332	0.013516	0.00732975	4.93724e-13
8	334	-0.0131763	0.00772312	3.74176e-40
8	335	-0.00644669	0.00785138	8.8163e-06
8	340	-0.00861047	0.0014227	3.05707e-51
9	9	-0.0109002	0.00930669	8.27258e-05
10	338	-0.00815714	0.00606955	0.000264456
11	29	0.0107612	0.00723749	1.70046e-10
11	30	0.0105405	0.00689627	3.23408e-08
11	39	0.0112469	0.00661589	1.58858e-13
11	49	0.0113754	0.00726627	8.24359e-12
11	86	0.0107719	0.00725982	7.60094e-09
11	87	0.00968765	0.00695155	0.000212389
11	204	0.0122957	0.00717682	1.05974e-15
11	208	0.0135158	0.00656328	1.03806e-33
11	209	0.0110238	0.00688393	3.38852e-11
11	235	0.00979716	0.00716408	0.000231478
11	337	0.014863	0.00709382	3.78579e-42
11	338	0.0154795	0.00667153	5.7055e-52
12	29	0.0102901	0.00690847	1.38765e-05
12	49	0.0110016	0.00696118	2.92027e-09
12	86	0.0096513	0.00662087	0.00907783
12	204	0.010871	0.00725447	5.51768e-08
12	208	0.0135132	0.00672307	4.52429e-30
12	209	0.0109945	0.0073842	8.47604e-10
12	235	0.0102946	0.00791601	2.12029e-07
12	262	-0.00817566	0.00722885	5.08252e-05
12	277	0.0109771	0.00747695	2.80575e-08
12	334	0.00955286	0.00682818	0.00769235
12	337	0.012202	0.00636125	1.23024e-19
12	338	0.0152425	0.00630793	1.48481e-38
12	339	0.0100405	0.00743125	5.39756e-05
13	305	0.00979331	0.00654309	2.69198e-05
14	305	0.0098419	0.0062571	5.0293e-06
15	16	0.0110389	0.00719902	1.55076e-05
15	19	0.0122856	0.00814333	2.76798e-12
15	20	0.0126385	0.00825246	5.83463e-13
15	78	-0.00869282	0.00740128	1.09192e-11
15	79	-0.00703423	0.00792582	0.00419764
15	118	0.0129129	0.00750347	1.01198e-15
15	119	0.0106936	0.00757337	0.000309545
15	167	0.0111578	0.00768531	1.54872e-05
15	168	0.0130518	0.00730545	2.04411e-17
15	174	-0.00820458	0.00735911	1.62706e-08
15	175	-0.00735915	0.00748553	1.31994e-05
15	194	-0.00959627	0.00692257	6.31445e-19
15	195	-0.00987474	0.00762368	5.49444e-19
15	205	0.0105782	0.00714892	0.000916468
15	214	-0.00701764	0.00715437	0.000921099
15	251	0.0120726	0.00724325	5.94299e-11
15	257	-0.00948963	0.0079209	6.76364e-16
15	260	-0.00993447	0.00703559	3.17799e-22
15	262	-0.0072246	0.00688329	6.01809e-05
15	266	-0.0110927	0.00745543	2.27893e-29
15	273	0.0134691	0.00715649	1.58915e-21
15	274	0.0127007	0.00816585	1.73841e-12
15	291	0.0110161	0.0077403	6.32924e-05
15	292	0.0122184	0.00775437	1.28197e-11
15	298	-0.00931346	0.00717404	1.33003e-16
15	300	0.011837	0.00790075	9.82271e-08
15	302	-0.0103756	0.0068236	5.24509e-27
15	308	0.0153564	0.00778073	1.02385e-29
15	314	-0.0114384	0.00766849	1.86533e-28
15	315	-0.00688122	0.00741627	0.00352637
15	316	0.0106208	0.00726249	0.000138143
15	319	-0.00747216	0.00746257	3.03863e-05
15	323	0.0119817	0.00769066	4.15786e-09
15	330	0.0119813	0.00804837	3.13962e-09
15	332	-0.0141896	0.00753286	2.01272e-55
15	334	0.0163021	0.00793335	4.52641e-32
15	335	0.0115061	0.00775762	1.19536e-08
15	336	0.0202484	0.00755663	1.11282e-47
15	339	0.016466	0.00723183	6.5584e-47
16	15	0.0111657	0.00759662	4.87825e-05
16	19	0.0130342	0.00696925	1.93233e-17
16	20	0.0142245	0.00738037	5.31368e-25
16	65	-0.00709179	0.00691739	8.15788e-05
16	78	-0.00911308	0.00729627	8.025e-16
16	118	0.015965	0.00735924	5.32211e-35
16	119	0.0118367	0.00771409	6.929e-08
16	165	0.0108447	0.00787708	0.000240662
16	167	0.0124552	0.00726813	2.42677e-12
16	168	0.0145872	0.0074413	1.23578e-27
16	175	-0.00738687	0.00772716	5.48663e-05
16	189	0.012119	0.00784793	4.2372e-09
16	190	0.0120717	0.00784966	7.5068e-09
16	194	-0.010079	0.00769118	2.47036e-21
16	195	-0.0113301	0.00771059	4.85921e-31
16	205	0.0121002	0.00790093	6.56866e-09
16	206	0.0112222	0.0073724	7.81788e-06
16	216	0.0116558	0.00700672	4.20488e-08
16	247	0.0111894	0.0076313	4.22833e-05
16	251	0.013593	0.00725565	6.99478e-20
16	257	-0.00929887	0.00755694	3.13832e-16
16	260	-0.00992964	0.00766975	2.56199e-20
16	263	-0.00718514	0.00700154	3.93643e-05
16	266	-0.0119001	0.00818636	4.48953e-29
16	273	0.0151132	0.00728891	4.78846e-33
16	274	0.0141797	0.00739879	1.52687e-24
16	289	0.0108935	0.00739753	0.000358021
16	291	0.0145085	0.00769133	1.09703e-25
16	292	0.0135127	0.0071694	2.50989e-20
16	298	-0.00989866	0.00693202	8.89452e-22
16	300	0.0136827	0.00746946	2.54267e-20
16	302	-0.0105408	0.0070724	2.7199e-28
16	308	0.0174706	0.00719576	6.12958e-55
16	314	-0.0131175	0.00774872	5.05037e-37
16	315	-0.00864315	0.00757178	5.16026e-11
16	317	0.0124576	0.00770954	2.94131e-11
16	319	-0.00942963	0.00743454	1.34819e-17
16	321	-0.0077247	0.0080684	1.04821e-05
16	323	0.0123012	0.00782956	4.78631e-10
16	330	0.0147945	0.00679	1.05839e-33
16	331	-0.00880642	0.00692745	7.04453e-15
16	332	-0.015431	0.00709448	2.17683e-46
16	334	0.0159837	0.00734739	2.91562e-40
16	335	0.0112441	0.00770787	3.02113e-05
16	336	0.0238411	0.00726529	4.19217e-106
16	337	-0.00777456	0.00718498	1.00679e-07
16	339	0.0170721	0.00704473	8.01702e-53
17	17	-0.0109719	0.00965	9.50529e-10
18	18	-0.00677548	0.00824788	0.00992482
18	336	0.0115173	0.0060341	3.39101e-06
18	340	-0.00924337	0.00137416	3.05707e-51
19	15	0.0121147	0.0084577	4.43098e-06
19	16	0.012792	0.00708711	1.37482e-10
19	20	0.0157113	0.00769671	9.69884e-30
19	78	-0.00913566	0.00816981	1.17432e-17
19	79	-0.00826917	0.00848396	4.4624e-11
19	110	-0.00617882	0.00789499	0.00236772
19	118	0.0171034	0.00789795	1.31167e-34
19	119	0.0122683	0.00743813	8.45819e-09
19	152	-0.00641248	0.00795983	0.00048675
19	161	0.0118937	0.00741973	0.000440479
19	162	0.0119253	0.00755551	2.2392e-05
19	165	0.011377	0.00796357	0.00328202
19	167	0.0122701	0.0071802	1.93887e-07
19	168	0.0155402	0.00789178	2.71703e-27
19	174	-0.00857318	0.00830668	1.01998e-13
19	175	-0.00945276	0.00792197	8.81457e-21
19	182	-0.00615913	0.00777756	0.0023741
19	194	-0.0105532	0.00784309	7.36644e-27
19	195	-0.0105448	0.00785063	2.07395e-29
19	205	0.0144552	0.00789258	3.11607e-19
19	206	0.0135681	0.00677635	4.93251e-17
19	214	-0.00593934	0.0074182	0.00704218
19	221	-0.00602608	0.00760784	0.00481615
19	244	0.0127608	0.00836269	6.64537e-10
19	247	0.0116095	0.00800948	0.000700706
19	251	0.0161668	0.00786384	2.09349e-32
19	257	-0.00865277	0.00797293	3.77219e-15
19	259	-0.0066454	0.00784849	6.12165e-05
19	260	-0.0106102	0.00809884	1.53478e-28
19	262	-0.00921365	0.00767572	4.57748e-20
19	263	-0.00743212	0.0076293	8.88261e-09
19	266	-0.0121894	0.00790731	2.20149e-42
19	273	0.0162281	0.00783763	5.63275e-30
19	274	0.0144092	0.00823618	1.13583e-17
19	275	-0.0068345	0.00817095	2.26443e-05
19	291	0.013999	0.00795494	5.78317e-16
19	292	0.0158152	0.0072894	3.43742e-33
19	298	-0.0109626	0.007588	1.86898e-34
19	300	0.0125606	0.00735854	1.10997e-08
19	302	-0.0111307	0.00806871	2.11439e-28
19	308	0.0182239	0.00811019	2.73356e-47
19	314	-0.0114221	0.00744162	1.41258e-33
19	315	-0.00806693	0.00804972	1.04505e-11
19	316	0.0131134	0.00781189	4.00744e-09
19	317	0.012187	0.00808925	6.63833e-06
19	319	-0.00895975	0.0074503	4.07798e-19
19	321	-0.00625352	0.00780988	0.000894502
19	323	0.0141294	0.00809955	2.66907e-16
19	331	-0.00624999	0.00778619	0.0012713
19	332	-0.0160224	0.00823671	2.80918e-61
19	334	0.0180219	0.00815857	7.84034e-37
19	335	0.0148562	0.00723729	7.26884e-25
19	336	0.0233727	0.00726475	1.30964e-97
19	339	0.0218125	0.00757997	1.62041e-81
19	340	-0.00569054	0.00159431	6.08281e-17
20	15	0.0122639	0.00814837	5.84415e-07
20	16	0.0136334	0.00718277	8.03992e-17
20	19	0.0156983	0.00729794	4.2487e-33
20	78	-0.0100701	0.00825057	1.01725e-21
20	79	-0.00941649	0.00796552	6.74002e-19
20	110	-0.00697409	0.008492	3.43635e-05
20	111	-0.00633945	0.00779123	0.0015122
20	118	0.0166933	0.00818243	1.78436e-35
20	119	0.0123085	0.00762626	1.59117e-07
20	151	-0.00652979	0.00747203	0.000216688
20	152	-0.008328	0.00775789	5.29884e-13
20	161	0.0126833	0.00831102	2.68332e-08
20	162	0.0112459	0.0077638	8.27258e-05
20	165	0.0120999	0.00841473	1.10363e-05
20	167	0.0126867	0.00809787	1.1932e-08
20	168	0.0159413	0.00795239	5.64597e-31
20	174	-0.0099191	0.00796321	3.75938e-22
20	175	-0.0099627	0.00866659	1.57607e-19
20	177	-0.00609587	0.00772846	0.00827979
20	189	0.0114053	0.00838674	0.00205968
20	190	0.0114322	0.00814209	0.0013077
20	194	-0.011221	0.00807573	4.19792e-29
20	195	-0.0127202	0.00806459	1.38377e-44
20	205	0.0140932	0.00830154	3.73835e-16
20	206	0.0129743	0.00765542	7.4538e-12
20	214	-0.00902834	0.00781103	1.99797e-17
20	215	-0.00645683	0.00793666	0.00078404
20	221	-0.00816339	0.00835921	8.79392e-11
20	244	0.0130131	0.00689915	2.63689e-13
20	247	0.0126647	0.00792371	5.47295e-09
20	248	0.0114024	0.00804353	0.00142527
20	251	0.0156764	0.00716897	8.52659e-34
20	257	-0.0102694	0.00773241	5.38749e-27
20	259	-0.00925988	0.00824727	1.81866e-17
20	260	-0.0124094	0.00833115	3.66423e-40
20	262	-0.0100549	0.00807106	6.66659e-22
20	263	-0.00865632	0.00787445	2.05751e-15
20	266	-0.0134233	0.00847979	6.19162e-47
20	273	0.0176725	0.00766075	2.21138e-47
20	274	0.014998	0.0073073	4.63207e-27
20	275	-0.00685512	0.00719095	5.28802e-06
20	289	0.0133316	0.0075285	1.36773e-13
20	291	0.0129612	0.007574	3.62948e-11
20	292	0.0143101	0.00838774	2.96719e-17
20	298	-0.0120145	0.00803534	4.21691e-39
20	300	0.0136126	0.00791094	2.727e-14
20	302	-0.013408	0.0077971	1.76951e-52
20	308	0.0198818	0.00776883	1.78379e-45
20	314	-0.0140847	0.00713298	1.04133e-44
20	315	-0.0079733	0.00840668	1.3321e-09
20	316	0.0135035	0.00719631	7.98887e-16
20	317	0.0135872	0.00804376	9.23704e-14
20	319	-0.00771238	0.00744435	4.65089e-10
20	321	-0.00813371	0.00790181	1.74695e-11
20	323	0.0130828	0.00772248	1.53477e-11
20	330	0.0129179	0.00760169	2.54438e-12
20	332	-0.0174414	0.00758727	3.0253e-87
20	334	0.0218237	0.00761131	4.15507e-82
20	335	0.0155012	0.00773338	9.56266e-29
20	336	0.0247864	0.00778298	1.17034e-101
20	339	0.0208193	0.00846755	3.33604e-65
20	340	-0.00567204	0.00163412	3.81785e-12
21	1	-0.00802295	0.00684542	0.000109915
21	61	-0.00813091	0.00744293	0.000132326
21	84	-0.00773441	0.00689103	0.0015068
21	86	0.0100207	0.00755577	0.000353906
21	126	-0.00775484	0.00709392	0.00105611
21	208	0.0114629	0.00699803	2.34712e-14
21	235	0.00943822	0.00719833	0.00934434
21	277	0.0101459	0.00681609	2.3625e-05
21	295	-0.00885648	0.00700468	1.31342e-08
21	305	-0.0095514	0.0068855	1.34839e-13
21	306	-0.00873559	0.00723951	2.56861e-07
21	329	-0.00803724	0.00729956	5.09646e-05
21	338	0.0116151	0.00704443	2.46986e-14
22	1	-0.00975135	0.00777227	4.38041e-14
22	2	-0.0089628	0.00731979	8.19827e-10
22	44	-0.00801761	0.00749853	6.13337e-05
22	47	-0.00750341	0.00729587	0.00289626
22	49	0.0115007	0.00729102	3.1872e-10
22	50	0.0100866	0.00724018	8.64591e-05
22	61	-0.008535	0.00755217	1.12105e-07
22	62	-0.00776718	0.0070804	0.00025935
22	84	-0.00911238	0.00688597	8.88072e-12
22	85	-0.00862647	0.00763539	1.82117e-07
22	86	0.0129807	0.0068664	9.44948e-24
22	87	0.0129602	0.00715119	4.16116e-20
22	126	-0.00915948	0.00860976	8.16799e-10
22	182	-0.00804684	0.00747209	4.44262e-05
22	204	0.0101272	0.00709193	0.000211383
22	208	0.0141102	0.00674045	1.31331e-30
22	209	0.0133871	0.0074256	4.00147e-23
22	235	0.0110729	0.00791338	4.55485e-08
22	236	0.00976057	0.00705184	0.00148783
22	277	0.0124366	0.00802586	3.43451e-15
22	290	0.0106157	0.0078882	1.95483e-06
22	295	-0.010989	0.00725738	3.05091e-23
22	296	-0.00996753	0.00696387	1.00453e-17
22	303	0.0108352	0.00790368	1.57505e-06
22	305	-0.0121336	0.00726284	1.96643e-31
22	306	-0.0101759	0.00789946	1.70392e-16
22	309	0.010469	0.00762746	2.76045e-05
22	313	0.0103244	0.00742407	6.78731e-05
22	328	0.010041	0.00691697	5.38285e-05
22	329	-0.0123806	0.00726585	1.93604e-36
22	330	-0.0100111	0.00758312	3.01081e-15
22	337	0.0140166	0.0078121	3.7459e-27
22	338	0.0169634	0.00732077	2.32596e-42
23	118	0.0109362	0.00657069	0.000341255
23	205	0.0113553	0.00671555	1.65933e-06
23	206	0.0106824	0.0064184	0.00173694
23	291	0.0120771	0.0070624	1.48263e-10
23	292	0.013276	0.00731306	1.3686e-16
23	323	0.0120738	0.00726178	1.51968e-08
23	336	0.0131895	0.00669257	2.16373e-18
23	339	0.0129959	0.00711248	1.31542e-14
24	118	0.0109822	0.0077288	1.8158e-06
24	291	0.0112652	0.00732394	1.25019e-09
24	292	0.0106148	0.00678955	1.14647e-05
24	308	0.0102863	0.00755215	0.000350491
24	314	-0.00732497	0.00735566	0.00415669
24	331	-0.00734591	0.00728519	0.000176187
24	332	-0.00789082	0.00717565	9.72272e-07
24	336	0.0138124	0.00691028	1.66063e-28
24	339	0.011547	0.00720061	4.50193e-11
25	279	-0.00707901	0.00732989	0.00359584
25	291	0.0119176	0.00720778	2.08343e-11
25	292	0.0128514	0.0069716	7.1926e-19
25	323	0.0115355	0.0070853	2.33355e-09
25	331	-0.00766276	0.00662545	1.25185e-05
26	214	0.0100765	0.00663953	0.00499906
26	291	0.0122814	0.00660175	8.38943e-16
26	292	0.0122794	0.00682151	3.38457e-14
26	323	0.0101956	0.00727284	0.00104673
26	326	0.0130637	0.00682598	5.44585e-21
26	327	0.0103371	0.0067671	0.000850689
27	27	-0.0127315	0.0097976	3.10961e-08
28	28	-0.0107217	0.00860632	1.91456e-05
29	29	0.0133708	0.0103834	2.51788e-08
29	30	0.0252989	0.00880826	7.68391e-88
29	33	-0.00828197	0.00789583	3.58113e-17
29	34	-0.00760887	0.00876987	6.96144e-11
29	37	0.0136179	0.00821586	2.43051e-09
29	38	0.0123371	0.00887182	0.00120103
29	39	0.0279001	0.00834045	7.76287e-110
29	40	0.0233839	0.00874895	1.61469e-75
29	44	0.0136013	0.00813226	2.0995e-09
29	49	0.023014	0.00823977	4.48256e-49
29	50	0.0197052	0.00785773	2.42508e-56
29	57	-0.00611802	0.00854146	8.61001e-05
29	58	-0.00730903	0.00853108	8.02145e-10
29	59	0.0126854	0.00816531	2.79875e-05
29	60	0.0148125	0.00831093	6.49008e-16
29	67	0.0151348	0.00869789	1.01557e-16
29	79	-0.00568299	0.0085972	0.00198212
29	82	-0.00693887	0.00846142	3.66203e-08
29	83	-0.00827605	0.00785183	2.75996e-17
29	84	-0.00618742	0.00859386	3.47891e-05
29	85	-0.00592454	0.00831983	0.000264951
29	86	0.0220816	0.00804295	2.3205e-73
29	87	0.0189996	0.0082565	2.51931e-39
29	95	-0.00595351	0.00785847	0.000985399
29	97	0.0129891	0.00912274	1.51888e-05
29	102	0.0151756	0.00833206	3.60122e-18
29	103	0.015393	0.00840471	2.4233e-19
29	115	-0.0059911	0.00803504	9.80267e-05
29	116	-0.00916075	0.00853437	9.59655e-21
29	117	-0.0101396	0.00881955	2.75033e-24
29	120	-0.00785158	0.00845141	7.02622e-13
29	121	-0.0101216	0.00829258	1.2033e-28
29	122	0.0134501	0.00863857	6.89804e-08
29	123	0.0143196	0.00880253	8.05854e-12
29	129	-0.0061625	0.0081693	2.9834e-05
29	131	0.0158422	0.00853997	7.87794e-22
29	132	0.0140414	0.008434	4.01462e-11
29	151	-0.00730868	0.00869861	1.03686e-10
29	152	-0.00554388	0.00847602	0.00410824
29	156	0.0144282	0.00832232	1.50184e-13
29	174	-0.00690707	0.00865035	1.76832e-08
29	175	-0.00717298	0.00851853	3.5474e-09
29	180	-0.00617872	0.00809459	2.21861e-05
29	189	-0.00770002	0.00819848	5.77868e-13
29	204	0.0257524	0.00775351	1.64488e-103
29	208	0.0252924	0.00775044	7.77109e-50
29	209	0.0226361	0.00870455	1.09879e-70
29	216	-0.00626057	0.00835619	1.88075e-05
29	221	-0.00572364	0.00835604	0.00116248
29	222	-0.0092279	0.00774892	1.16925e-24
29	223	-0.00590695	0.00837039	0.000325624
29	224	-0.00928235	0.00948029	2.97458e-18
29	225	0.015397	0.00878302	4.63521e-18
29	226	0.0133522	0.00790222	1.54888e-08
29	235	0.0198272	0.0080339	1.04024e-55
29	236	0.01526	0.0085322	4.95094e-18
29	237	-0.00586632	0.00793025	0.000102657
29	242	-0.007787	0.00844106	2.59718e-11
29	253	0.012404	0.00821679	0.000299255
29	262	-0.00961605	0.00871809	4.63848e-23
29	270	0.0164484	0.00835429	6.24487e-27
29	271	0.0135798	0.00864435	1.83401e-08
29	277	0.0186511	0.00863242	9.62645e-42
29	279	0.0169698	0.00868498	4.99519e-29
29	280	0.0134606	0.00870643	1.48667e-06
29	281	-0.00504644	0.00840736	0.00915958
29	299	-0.00736718	0.00845445	2.94646e-10
29	302	-0.00817063	0.00873136	5.42436e-14
29	309	0.0127102	0.00843728	3.88106e-05
29	310	0.0149212	0.00858918	9.44913e-16
29	311	0.0134468	0.008144	1.30595e-08
29	312	0.0158769	0.00862731	1.02711e-21
29	313	0.0196759	0.00881842	4.61775e-48
29	322	0.0193263	0.00838271	1.33836e-38
29	324	-0.00848595	0.00917917	1.30391e-14
29	329	-0.00693833	0.0078692	4.0591e-09
29	330	-0.00598028	0.00855324	0.000248938
29	331	0.0226553	0.0081699	2.57691e-76
29	333	-0.0122091	0.00855469	2.19354e-34
29	334	0.0164707	0.00821263	9.25939e-27
29	335	0.0148007	0.00894554	4.35438e-14
29	337	0.0375493	0.0078478	2.49143e-167
29	338	0.0328064	0.00841755	6.9462e-51
29	339	0.0137713	0.00824379	4.46193e-10
29	340	-0.0195441	0.00180864	3.05707e-51
30	29	0.0250574	0.00847612	4.44243e-89
30	30	0.0165866	0.0100095	7.16702e-19
30	33	-0.00908658	0.00810525	7.31125e-23
30	34	-0.00716253	0.00810704	1.62414e-10
30	37	0.0164647	0.00858768	3.39307e-24
30	38	0.0146629	0.00840231	2.1302e-14
30	39	0.0310814	0.00806614	2.51817e-131
30	40	0.0260554	0.0080316	3.06293e-50
30	43	0.0125956	0.0082069	0.000175968
30	44	0.0136754	0.00849916	1.50145e-08
30	49	0.0232242	0.00843323	9.36046e-77
30	50	0.0199379	0.00884057	6.52054e-49
30	57	-0.00592579	0.008191	7.99475e-05
30	58	-0.0059065	0.0089853	0.000322161
30	59	0.0149623	0.00914642	8.46485e-14
30	60	0.0166596	0.00894978	4.38888e-22
30	67	0.0175754	0.0082455	4.10477e-35
30	68	0.0132537	0.00859784	1.39813e-06
30	76	0.0133891	0.00878046	6.37385e-07
30	82	-0.00834952	0.00884354	4.08146e-14
30	83	-0.010089	0.00798306	7.6816e-28
30	84	-0.00653796	0.00875768	1.07306e-06
30	85	-0.00705762	0.008346	1.62217e-09
30	86	0.0239438	0.00785519	1.57526e-88
30	87	0.0206184	0.00758933	1.44716e-65
30	94	-0.0069819	0.00870786	1.45466e-08
30	95	-0.00698703	0.00894297	1.09459e-08
30	97	0.0145978	0.00818439	3.4437e-14
30	102	0.015858	0.00800084	2.22889e-23
30	103	0.0159593	0.00760224	4.02167e-26
30	105	-0.00600009	0.00836069	5.93725e-05
30	114	-0.0066096	0.00831406	1.92724e-07
30	115	-0.00594046	0.00844653	0.000110994
30	116	-0.00954983	0.0085647	1.0449e-22
30	117	-0.0087489	0.00874359	3.82023e-18
30	120	-0.00780754	0.00812728	3.40725e-14
30	121	-0.00995594	0.00822974	1.13749e-28
30	122	0.0131325	0.00846855	3.85375e-06
30	123	0.0145196	0.0093789	4.68107e-11
30	129	-0.00582033	0.00866911	0.000379648
30	131	0.0181521	0.00873744	1.15792e-31
30	132	0.0150485	0.00857925	8.48523e-16
30	156	0.0137397	0.00821106	2.45514e-09
30	178	-0.00607822	0.00850252	4.08755e-05
30	180	-0.00677782	0.00833759	3.55528e-08
30	189	-0.0111764	0.00834287	2.53033e-37
30	204	0.0266432	0.0085874	3.33139e-98
30	208	0.0262718	0.00755919	7.71453e-109
30	209	0.0237301	0.00855529	4.59876e-79
30	210	-0.00565823	0.00879534	0.00131163
30	216	-0.00802081	0.00878496	1.02979e-13
30	222	-0.00689024	0.00816283	5.37651e-09
30	223	-0.00543234	0.00878284	0.00904531
30	224	-0.00718688	0.00889154	3.19252e-09
30	225	0.0159253	0.0089942	7.40314e-20
30	226	0.0140939	0.00829702	5.05547e-11
30	233	0.0128237	0.00866701	6.4434e-05
30	235	0.0195736	0.00813193	8.27129e-52
30	236	0.0140896	0.0082363	3.97548e-11
30	242	-0.00716527	0.00843246	9.16399e-10
30	245	0.0126007	0.00839029	0.000226276
30	253	0.0119268	0.00792483	0.00286574
30	262	-0.0065987	0.00880119	8.51951e-07
30	270	0.0165854	0.00752443	1.07056e-31
30	271	0.0132237	0.00807291	4.38093e-07
30	277	0.0183334	0.00814811	1.00707e-33
30	279	0.019878	0.00930277	3.5833e-45
30	280	0.0164397	0.00789978	2.66158e-28
30	281	-0.00850139	0.00891448	4.8633e-16
30	297	0.0121613	0.00860226	0.00131136
30	299	-0.00793844	0.00868272	1.66354e-13
30	303	0.0123383	0.00841228	0.0014762
30	309	0.0148536	0.00864385	1.8377e-14
30	310	0.0168883	0.00844654	9.07031e-29
30	311	0.0132831	0.0084208	6.58233e-07
30	312	0.0186415	0.00865186	1.32825e-40
30	313	0.0226244	0.00874912	2.7636e-69
30	319	0.0120526	0.00865717	0.0046306
30	322	0.0213958	0.0085451	3.11867e-62
30	324	-0.0105462	0.0081448	1.28929e-28
30	329	-0.00823315	0.00837641	4.25529e-16
30	330	-0.00947548	0.00762999	1.29453e-26
30	331	0.0275264	0.00865545	6.26634e-103
30	333	-0.00959438	0.00899839	1.32477e-22
30	335	0.0127045	0.00881517	0.000200559
30	337	0.0414301	0.00822415	1.72414e-177
30	338	0.034068	0.00863413	3.14741e-139
30	340	-0.0216896	0.00179221	1.09465e-299
31	39	0.010048	0.00723416	0.000357539
31	331	0.00993386	0.00705297	0.000156684
31	337	0.0137862	0.00721203	1.06353e-28
31	338	0.0106341	0.00691753	3.97461e-07
31	340	-0.00765033	0.00145135	3.32925e-39
32	39	0.011331	0.00695707	3.52772e-12
32	279	0.00960693	0.0071219	0.00759625
32	331	0.0104826	0.00698523	1.87504e-06
32	337	0.0134581	0.00657811	1.59751e-28
32	338	0.0105628	0.00677488	4.64863e-07
32	340	-0.0076406	0.00141847	2.69322e-39
33	1	0.0124582	0.00720099	1.25801e-16
33	2	0.0114668	0.00798634	2.68009e-08
33	29	-0.00844368	0.00741337	5.00293e-08
33	30	-0.00890509	0.00718512	3.93286e-11
33	37	-0.00846122	0.00749057	5.42127e-08
33	38	-0.0080242	0.00692582	1.28108e-06
33	49	-0.0104109	0.00758517	2.4017e-19
33	50	-0.00898541	0.00717396	3.88678e-13
33	84	0.0112934	0.00716495	7.77419e-10
33	85	0.0104388	0.00689456	6.36801e-05
33	86	-0.0126408	0.00697316	3.20106e-43
33	87	-0.0121143	0.00703604	8.01424e-38
33	96	-0.00769144	0.0073527	0.000113108
33	97	-0.00741969	0.00735167	0.00108227
33	103	-0.00729221	0.00726394	0.00250803
33	123	-0.00782601	0.00774188	7.31744e-05
33	126	0.010337	0.00755954	0.000527688
33	204	-0.0104463	0.00768041	4.20717e-20
33	208	-0.0140179	0.00827165	7.26628e-37
33	209	-0.0124127	0.0073404	3.67454e-38
33	235	-0.00989579	0.00759603	3.96861e-17
33	236	-0.00810758	0.00722031	1.25512e-06
33	277	-0.0109206	0.0078283	5.686e-23
33	295	0.014129	0.00710894	3.4569e-29
33	296	0.010499	0.00681651	2.52226e-06
33	303	-0.00939811	0.00772874	1.24829e-12
33	305	0.0149507	0.00734101	3.83086e-31
33	306	0.0133121	0.00708289	1.69974e-23
33	309	-0.0103724	0.00751466	2.99043e-20
33	313	-0.00938418	0.00789571	4.00162e-13
33	329	0.0149593	0.00745078	2.86437e-35
33	330	0.0137633	0.00787842	3.69436e-23
33	333	0.0100545	0.00737951	0.000727007
33	337	-0.0121614	0.00690761	2.73547e-39
33	338	-0.0159248	0.00722609	1.96007e-45
34	49	-0.00854672	0.00762122	1.45333e-06
34	50	-0.00742485	0.00639823	0.00537974
34	84	0.0101342	0.00781158	0.000383288
34	86	-0.00889204	0.00748211	3.26675e-09
34	87	-0.0087749	0.00725851	3.87395e-08
34	126	0.00939284	0.00777389	0.00215502
34	204	-0.00908732	0.00741321	4.84707e-09
34	208	-0.0116244	0.0072692	5.5591e-26
34	209	-0.00980167	0.00753577	8.92893e-14
34	235	-0.00877868	0.00641485	8.5878e-10
34	236	-0.0073225	0.00777821	0.00413229
34	277	-0.00898671	0.00757836	7.27778e-10
34	295	0.0114607	0.00737729	1.58666e-11
34	305	0.0124044	0.00744886	3.5236e-18
34	306	0.0111554	0.00753428	2.91223e-08
34	329	0.0109997	0.00630874	2.86079e-11
34	333	0.00965406	0.00719774	0.0034426
34	337	-0.00749459	0.00736306	0.00125233
34	338	-0.0124418	0.00706319	4.21632e-32
35	1	-0.00872406	0.0071779	3.75926e-14
35	2	-0.00695816	0.00692937	0.000120395
35	43	-0.00775152	0.00742658	1.422e-07
35	44	-0.00746077	0.00812866	4.15201e-06
35	61	-0.00765496	0.00686474	5.06552e-08
35	62	-0.00682222	0.0071432	0.000588519
35	84	-0.00729747	0.0068319	2.72893e-06
35	85	-0.00672757	0.00683881	0.000125527
35	86	0.0106161	0.00723917	0.0048715
35	126	-0.00690321	0.00756677	0.000584454
35	182	-0.0069658	0.00651457	4.43647e-05
35	205	0.0112603	0.00747837	3.83284e-05
35	208	0.0117594	0.00695589	3.08117e-08
35	285	0.0102187	0.00675549	0.00493216
35	290	0.0126492	0.00800325	6.34149e-11
35	292	0.0125878	0.00670521	2.65635e-14
35	293	0.0110034	0.0072666	0.000672225
35	294	0.0103638	0.0074495	0.00847713
35	295	-0.00862071	0.00710306	1.66619e-14
35	296	-0.00909712	0.00657661	2.45732e-19
35	303	0.0109813	0.00710425	0.000230966
35	305	-0.00944841	0.00694782	2.37304e-19
35	306	-0.00894733	0.00729254	3.3335e-14
35	323	0.0108894	0.0068961	0.000359921
35	326	0.0136587	0.00720696	2.10437e-19
35	327	0.0113128	0.00747651	1.94235e-06
35	328	0.0134789	0.00743769	3.41973e-19
35	329	-0.00961061	0.00732302	4.08196e-20
35	330	-0.00757463	0.00696837	1.60944e-07
35	337	0.0107273	0.00669237	0.00105384
35	338	0.0127679	0.00756908	2.14666e-15
35	339	0.0109011	0.0072722	0.000171327
36	1	-0.0102933	0.00708062	5.98243e-23
36	2	-0.00792416	0.00726903	1.742e-07
36	33	-0.00694756	0.00695384	0.0013903
36	43	-0.00688106	0.00788782	0.00624968
36	44	-0.00862904	0.00798178	6.07439e-10
36	47	-0.00702181	0.00763435	0.000567233
36	49	0.0107765	0.0078622	0.00048271
36	61	-0.00793986	0.00740168	1.21378e-08
36	62	-0.00826339	0.00748929	6.67192e-09
36	84	-0.00802376	0.00756819	1.41699e-07
36	85	-0.0070068	0.00724765	0.000193498
36	86	0.0120104	0.00767788	9.50975e-10
36	87	0.0124286	0.00717852	1.50856e-13
36	126	-0.00895785	0.00776437	1.54312e-11
36	181	-0.00675896	0.00760105	0.00775421
36	182	-0.00732085	0.00693127	4.71131e-05
36	205	0.0108789	0.00761231	0.000140445
36	208	0.0138795	0.00706612	2.55085e-23
36	209	0.0124229	0.00782067	8.58035e-12
36	235	0.0106726	0.00802631	0.000491357
36	277	0.0121076	0.00729643	5.04805e-11
36	285	0.0109085	0.00733464	6.2988e-05
36	290	0.0127303	0.00741443	1.08693e-14
36	295	-0.00964382	0.0070856	2.72336e-20
36	296	-0.00941939	0.00701914	7.16529e-18
36	303	0.0112852	0.00720483	9.46274e-07
36	305	-0.0111812	0.00787877	1.89079e-27
36	306	-0.00933722	0.00759306	3.27671e-15
36	326	0.01046	0.00746747	0.00292839
36	328	0.0125919	0.00758459	1.90529e-13
36	329	-0.0113707	0.00755214	5.9878e-31
36	330	-0.00909538	0.00692658	9.20638e-16
36	337	0.013021	0.00712382	5.04048e-18
36	338	0.0155148	0.00706617	8.08596e-40
36	339	0.0106897	0.00704044	0.000649289
37	1	-0.0101489	0.00773989	2.74852e-17
37	2	-0.00765632	0.00772252	0.000489709
37	22	0.0105445	0.00745027	2.14968e-05
37	29	0.0144119	0.00718087	6.10455e-33
37	30	0.0164765	0.00721365	2.94978e-51
37	33	-0.00872584	0.00830175	6.20122e-09
37	38	0.0138577	0.00716013	3.07438e-28
37	39	0.0169299	0.00730071	1.8013e-54
37	40	0.0138012	0.00760997	2.92795e-25
37	49	0.0131501	0.00772511	4.49977e-19
37	50	0.0135945	0.0080449	3.52427e-22
37	82	-0.00734009	0.00758639	0.00403343
37	83	-0.00859372	0.00705981	4.74654e-10
37	84	-0.00875239	0.00731198	3.46809e-11
37	85	-0.00912399	0.00754864	3.94336e-11
37	86	0.0180722	0.00871961	3.00264e-51
37	87	0.016892	0.00703999	8.7898e-57
37	97	0.0109865	0.00740443	3.86785e-07
37	103	0.0113145	0.00765936	6.83488e-09
37	105	-0.00771333	0.00758263	0.000248449
37	131	0.010602	0.00721523	1.38111e-05
37	176	0.0106437	0.00789309	4.25771e-05
37	189	-0.0111024	0.0073256	2.50112e-24
37	190	-0.00898078	0.0083152	7.07045e-10
37	199	-0.00852711	0.00815306	4.81208e-07
37	204	0.0173482	0.0079046	4.5042e-40
37	208	0.0170606	0.00737369	6.58638e-55
37	209	0.0167819	0.00752782	1.99203e-38
37	216	-0.00987368	0.00773397	1.93737e-15
37	231	-0.0100243	0.00747192	3.45338e-16
37	235	0.0107809	0.00796307	1.44451e-05
37	247	-0.00720827	0.0076276	0.00962521
37	277	0.0124057	0.00786056	9.47898e-14
37	281	-0.010184	0.00763548	6.49819e-18
37	289	-0.00789553	0.00788457	9.23543e-05
37	295	-0.00849392	0.00724342	3.1105e-08
37	299	-0.00738974	0.00771497	0.00331375
37	300	-0.00938537	0.00801488	2.98863e-13
37	303	0.0127869	0.00737042	1.68017e-18
37	305	-0.00871255	0.00732473	7.71038e-10
37	309	0.0133408	0.00740918	1.25265e-22
37	312	0.0102167	0.00790445	0.000281286
37	313	0.0166256	0.00753425	2.49738e-39
37	314	0.0104396	0.00796162	0.000262592
37	317	-0.00862345	0.00796078	1.87845e-08
37	322	0.0126263	0.00792754	1.83252e-15
37	329	-0.0145174	0.00747338	6.35961e-55
37	330	-0.0163082	0.00721232	3.27917e-73
37	331	0.0123781	0.00747344	2.97341e-15
37	336	-0.0101245	0.00712334	3.94668e-19
37	337	0.0265218	0.00778036	1.12947e-120
37	338	0.0214708	0.00722459	1.7699e-93
37	340	-0.00917189	0.00154864	6.19017e-50
38	1	-0.00888017	0.00758852	1.19011e-10
38	2	-0.00848071	0.00739985	8.84072e-09
38	29	0.0118654	0.00738266	4.12762e-11
38	30	0.0145319	0.00691977	2.17008e-34
38	33	-0.00800158	0.00730895	1.75093e-06
38	37	0.0129058	0.00744175	5.99889e-18
38	39	0.0143838	0.00716174	2.2919e-31
38	40	0.0124895	0.00705738	2.61662e-16
38	49	0.0118141	0.00752004	1.71247e-10
38	50	0.012156	0.00770485	2.20683e-13
38	83	-0.00745582	0.00765463	0.000581707
38	84	-0.0074961	0.00739541	0.000279243
38	85	-0.00881866	0.00746668	2.73792e-10
38	86	0.0164404	0.00713605	3.60829e-50
38	87	0.0154239	0.00817629	4.83052e-31
38	103	0.0100946	0.00740533	0.00524417
38	176	0.0110621	0.00773041	2.6687e-06
38	189	-0.00945146	0.00808873	8.04756e-13
38	190	-0.00708502	0.00772063	0.00807032
38	195	0.0101399	0.00746665	0.00412556
38	199	-0.00727058	0.00720367	0.0012907
38	204	0.0154871	0.00777509	1.27773e-36
38	208	0.0145273	0.00706282	2.57053e-33
38	209	0.0148272	0.00781096	5.2944e-31
38	216	-0.00833613	0.00773483	1.70558e-07
38	230	-0.0070674	0.0076859	0.00705995
38	231	-0.00907377	0.00685199	7.07084e-14
38	247	-0.00706578	0.00689099	0.00408933
38	273	-0.00728109	0.00773359	0.00230574
38	277	0.0111218	0.00725572	3.3173e-07
38	281	-0.00931492	0.00783838	1.22319e-12
38	287	0.0101858	0.00753835	0.00326115
38	289	-0.00762675	0.00777468	0.000179784
38	295	-0.00804585	0.00735817	1.25313e-06
38	296	-0.00754008	0.00750375	0.000232122
38	300	-0.00937562	0.00758872	1.07305e-13
38	303	0.0114576	0.00759801	2.2182e-08
38	305	-0.00843946	0.00714608	5.00218e-09
38	309	0.0123974	0.00735827	1.26946e-14
38	313	0.0137461	0.00743421	2.07103e-24
38	314	0.0108718	0.00828199	6.33586e-05
38	317	-0.00817883	0.0079062	1.15756e-07
38	322	0.0109777	0.00751292	3.49976e-06
38	326	0.0104519	0.00726672	7.34721e-05
38	329	-0.0135508	0.00734942	4.67594e-49
38	330	-0.0146572	0.00734817	7.82567e-59
38	331	0.0111792	0.00791089	1.34122e-06
38	336	-0.010436	0.00712153	2.19492e-23
38	337	0.023943	0.00723989	2.50389e-110
38	338	0.0188306	0.00734822	4.47327e-69
38	340	-0.00901632	0.0016565	2.48642e-50
39	3	-0.00555687	0.00846226	7.37556e-07
39	4	-0.00559466	0.00946864	5.79302e-06
39	24	-0.00490763	0.00896445	0.000404879
39	26	-0.00473462	0.00878074	0.00101393
39	29	0.0278356	0.00909424	5.92062e-94
39	30	0.0307388	0.00989894	3.56156e-102
39	33	-0.00739834	0.00890522	2.53604e-15
39	34	-0.00502761	0.0089764	0.00017881
39	37	0.017049	0.00904145	1.04643e-20
39	38	0.0141356	0.009146	9.74888e-06
39	39	0.023794	0.010889	6.64487e-38
39	40	0.0306798	0.00952249	7.69797e-106
39	43	0.0218471	0.00905338	1.77855e-40
39	44	0.0235328	0.00802986	2.7689e-76
39	49	0.0232735	0.00942351	4.05092e-61
39	50	0.0211514	0.00903203	2.56061e-49
39	57	-0.00567152	0.00899523	1.02625e-06
39	58	-0.00497611	0.0093335	0.001209
39	59	0.0214719	0.00938285	4.9369e-49
39	60	0.0225564	0.00916735	2.83942e-58
39	61	0.0173411	0.00876885	1.12315e-23
39	62	0.0132712	0.00901422	0.00323056
39	67	0.022847	0.00912009	1.04184e-60
39	68	0.0190316	0.00949945	1.28418e-31
39	76	0.0165227	0.00898729	1.12787e-17
39	77	0.015008	0.00826785	8.49351e-11
39	80	0.0136585	0.0088988	0.000238568
39	81	0.0140344	0.00857837	6.82285e-06
39	82	-0.00693383	0.00924615	5.27621e-12
39	83	-0.0104632	0.0088863	8.6157e-36
39	86	0.0238161	0.00922895	1.78391e-66
39	87	0.0197274	0.00889514	6.38605e-40
39	94	-0.0085053	0.00928577	1.00061e-20
39	95	-0.00738384	0.00908771	3.8579e-12
39	102	0.0158751	0.00938061	5.25776e-13
39	103	0.0168053	0.00885466	7.73058e-20
39	105	-0.0057725	0.00909256	3.00998e-06
39	114	-0.00665325	0.00881705	1.86867e-11
39	115	-0.0061106	0.00904926	1.82295e-08
39	116	-0.0102477	0.00936103	1.1284e-31
39	117	-0.00811472	0.00900318	2.64916e-19
39	120	-0.00749945	0.00871154	7.21227e-18
39	121	-0.00979305	0.00911841	8.18938e-30
39	123	0.0137205	0.00941867	0.00174065
39	129	-0.00697474	0.00888217	5.16492e-13
39	130	-0.00565388	0.00842946	2.58343e-07
39	131	0.0216954	0.00883623	8.29989e-55
39	132	0.0175135	0.00821152	1.6752e-27
39	139	-0.00465468	0.00965662	0.00379858
39	145	-0.00452363	0.00876756	0.00364983
39	156	0.0140842	0.00902205	8.03265e-06
39	158	-0.00668853	0.00835243	1.11622e-12
39	167	-0.00511996	0.00895461	8.82015e-05
39	178	-0.00767421	0.00868134	1.64855e-16
39	179	-0.00618857	0.00899783	6.90517e-09
39	180	-0.00733864	0.00881574	3.18666e-15
39	189	-0.0110898	0.00851863	7.54457e-43
39	190	-0.00515484	0.00859818	3.59674e-05
39	192	0.0162087	0.00840561	1.55689e-18
39	204	0.0289003	0.00906354	9.90469e-101
39	208	0.0238434	0.00809224	6.27222e-78
39	209	0.0237948	0.00935216	2.97276e-65
39	210	-0.00573149	0.00873823	2.95408e-07
39	213	0.0147853	0.00860933	4.46438e-09
39	216	-0.00928333	0.00933766	2.02329e-25
39	220	-0.00500384	0.00976438	0.000585542
39	222	-0.00618246	0.00898145	6.94771e-09
39	224	-0.00481756	0.0088983	0.00067912
39	225	0.0175182	0.00881255	1.10101e-24
39	226	0.0156766	0.00851401	5.29692e-14
39	235	0.0184595	0.009508	7.87005e-28
39	240	-0.00637426	0.00921	2.3188e-08
39	242	-0.00639979	0.00958574	6.07829e-09
39	245	0.0170997	0.00882673	7.73822e-22
39	253	0.0145062	0.00844693	5.0275e-08
39	270	0.0212383	0.00889454	5.42291e-51
39	271	0.0178659	0.00944816	2.6907e-24
39	277	0.0165419	0.00902529	1.19624e-17
39	279	0.0300131	0.00930924	1.85853e-104
39	280	0.0239999	0.00831741	1.2244e-76
39	281	-0.00782309	0.00910708	3.26156e-17
39	291	-0.00595342	0.00838092	5.35601e-10
39	299	-0.00625544	0.00938854	2.51184e-09
39	300	-0.00531899	0.00902503	3.62774e-05
39	306	0.0142831	0.0088164	1.30119e-06
39	309	0.0139593	0.00871948	1.74684e-05
39	310	0.0197546	0.00877312	6.36323e-41
39	311	0.0150125	0.00948277	9.00876e-09
39	312	0.0234667	0.00913529	6.70002e-65
39	313	0.0233369	0.00893944	9.60255e-66
39	319	0.018555	0.00928321	1.65369e-29
39	320	0.0138367	0.0086886	0.000167018
39	322	0.0235401	0.0084809	1.37384e-71
39	324	-0.0104854	0.0090163	3.44677e-35
39	330	-0.007325	0.00806477	1.87859e-17
39	331	0.0363489	0.00905507	4.0941e-140
39	333	-0.00886106	0.00876003	4.00504e-25
39	334	0.0150251	0.00867191	3.89976e-10
39	337	0.0469637	0.00873972	4.54418e-187
39	338	0.0338481	0.00874745	7.81917e-132
39	340	-0.0286611	0.00193286	5.888633089953001e-338
40	3	-0.00554366	0.00764769	0.000233195
40	4	-0.0061777	0.00855672	6.17209e-06
40	29	0.0238415	0.0085275	3.49306e-79
40	30	0.0263225	0.00877378	3.69205e-93
40	33	-0.00545835	0.00819998	0.000992576
40	37	0.0140307	0.00833969	6.84621e-10
40	38	0.0126206	0.00813205	0.00036702
40	39	0.0309876	0.00858116	3.45039e-123
40	40	0.0145803	0.0101011	3.10961e-08
40	43	0.0193056	0.00859158	5.16209e-45
40	44	0.0201539	0.0082958	6.45986e-54
40	49	0.0198036	0.00858944	8.22172e-49
40	50	0.0173386	0.00831273	4.81284e-28
40	57	-0.00535433	0.00852964	0.000399293
40	59	0.0183349	0.00795652	4.42383e-42
40	60	0.0201956	0.00867272	4.06487e-51
40	61	0.0149143	0.00813083	1.83219e-15
40	62	0.0133646	0.00893388	3.93866e-06
40	67	0.0194538	0.00805467	2.08555e-50
40	68	0.0170322	0.00860725	5.26021e-28
40	76	0.0139516	0.00824756	1.17609e-09
40	77	0.0124323	0.00846582	0.00205429
40	81	0.0126579	0.008045	0.000241377
40	82	-0.00562561	0.0083865	0.000388104
40	83	-0.00845039	0.00816599	2.76747e-17
40	86	0.0201154	0.00892784	1.46295e-48
40	87	0.016913	0.00757957	6.05689e-33
40	94	-0.00771706	0.00878423	8.60347e-13
40	95	-0.00704493	0.008247	6.31842e-12
40	102	0.013391	0.00860843	4.11356e-06
40	103	0.0132203	0.00760641	4.59233e-07
40	114	-0.00633749	0.00851453	1.29595e-06
40	115	-0.00615915	0.00835628	4.57558e-06
40	116	-0.0098872	0.00798936	1.59584e-30
40	117	-0.00740937	0.0088195	4.2654e-11
40	120	-0.00784781	0.00866616	1.2051e-14
40	121	-0.00922799	0.00869748	5.79682e-21
40	129	-0.00600425	0.00825741	1.47052e-05
40	130	-0.00601085	0.00843087	2.00056e-05
40	131	0.0182862	0.00828186	2.36423e-39
40	132	0.0153173	0.00872167	3.54634e-16
40	158	-0.00654665	0.00845309	1.39927e-07
40	167	-0.0055665	0.00880107	0.00184758
40	178	-0.00671225	0.00928866	4.06414e-08
40	179	-0.00515171	0.00858285	0.00940911
40	180	-0.00636764	0.00871373	1.62926e-06
40	189	-0.010194	0.0083531	8.29676e-31
40	192	0.0149772	0.00871555	3.35134e-14
40	204	0.0244055	0.00826361	1.74427e-48
40	208	0.0196867	0.00829176	2.75298e-50
40	209	0.019471	0.00826891	8.96595e-49
40	210	-0.00628306	0.00802133	5.44955e-08
40	213	0.0133868	0.00825947	5.75414e-07
40	216	-0.00890477	0.00887542	1.58941e-19
40	225	0.0147056	0.00868912	6.34149e-11
40	226	0.0135051	0.0082039	1.45008e-07
40	235	0.0150421	0.00869284	1.23459e-14
40	240	-0.00612633	0.00743532	4.96594e-07
40	242	-0.00557703	0.008953	0.00110512
40	245	0.0141089	0.00938509	1.41287e-08
40	270	0.018384	0.00871424	2.19262e-32
40	271	0.0156266	0.00875115	5.66791e-18
40	277	0.0128974	0.00832846	5.78031e-05
40	279	0.0267839	0.00825349	3.02192e-102
40	280	0.0215585	0.00804038	2.4893e-67
40	281	-0.00768481	0.00842179	2.6659e-14
40	291	-0.00596773	0.00830193	2.22036e-05
40	299	-0.00580281	0.00877397	0.000189053
40	300	-0.00559855	0.00834793	0.000447112
40	306	0.0131136	0.0085721	1.53702e-05
40	310	0.01681	0.00800977	1.6349e-29
40	311	0.0133387	0.00889265	4.48414e-06
40	312	0.0198812	0.00824673	3.41114e-52
40	313	0.0198843	0.00878958	2.10003e-36
40	319	0.0164024	0.00804572	3.33772e-26
40	322	0.0203032	0.00824705	1.63937e-55
40	324	-0.00929102	0.00822846	9.08907e-25
40	330	-0.00664391	0.00885712	1.78921e-07
40	331	0.0324332	0.00821823	8.3147e-136
40	333	-0.00727243	0.00865282	1.00364e-10
40	337	0.0399653	0.00792691	1.97703e-175
40	338	0.0278791	0.00850985	5.21975e-106
40	340	-0.0243805	0.00183222	4.823872867007009e-316
41	41	-0.011441	0.00881468	3.9231e-06
42	42	-0.0120063	0.00895824	2.25036e-06
43	1	0.0218264	0.00899259	1.93402e-57
43	2	0.0170916	0.00915281	3.71602e-23
43	3	-0.00566877	0.00872288	1.94813e-05
43	4	-0.00587109	0.00881609	4.27929e-06
43	21	-0.00626338	0.00859004	5.56302e-08
43	22	-0.00565399	0.00904657	4.0224e-05
43	25	-0.00597169	0.00801401	1.85059e-07
43	30	0.0131067	0.00916637	0.000869373
43	35	-0.00769441	0.00872258	3.62174e-15
43	36	-0.00716167	0.00926663	1.3597e-11
43	39	0.0220293	0.00853866	6.68887e-63
43	40	0.0195296	0.00862516	1.92891e-35
43	43	0.0195075	0.0104875	1.94368e-29
43	44	0.0357054	0.00899865	9.87599e-140
43	47	0.0172012	0.00891192	7.08406e-25
43	48	0.0181255	0.00908538	2.37028e-30
43	53	-0.00552254	0.00944988	0.000195533
43	59	0.0278681	0.00910465	1.54284e-96
43	60	0.0249577	0.00860108	2.9043e-83
43	61	0.0304778	0.00836948	9.90056e-121
43	62	0.0260857	0.00857651	1.39389e-48
43	67	0.0216904	0.00876778	2.38047e-58
43	68	0.020494	0.0093289	1.91584e-45
43	81	0.0134543	0.00919765	8.6328e-05
43	84	0.0163126	0.00874265	1.04577e-19
43	92	-0.00649564	0.00859862	4.86513e-09
43	94	-0.00528519	0.00893842	6.81473e-05
43	108	0.0152107	0.00978429	7.08719e-12
43	109	0.0155267	0.00917685	8.56941e-14
43	126	0.0197473	0.00898353	1.84619e-42
43	127	0.0175546	0.00880174	8.40203e-28
43	128	0.0138379	0.00881492	1.79163e-06
43	131	0.0138427	0.00832885	4.70043e-07
43	143	-0.00659038	0.00909864	1.0557e-08
43	144	-0.00771975	0.00912946	1.48825e-14
43	149	-0.00566609	0.00927422	5.43285e-05
43	153	-0.00658649	0.00956719	4.78595e-08
43	161	-0.00625918	0.00870088	8.25152e-08
43	162	-0.00520586	0.00877034	0.000666811
43	163	-0.00660016	0.00880967	3.43049e-09
43	164	-0.0047312	0.00829605	0.0077721
43	181	0.0224026	0.00826726	2.52147e-68
43	182	0.0187894	0.00886286	2.80136e-36
43	187	0.0152588	0.00902169	9.99838e-13
43	188	0.013995	0.00868625	2.93272e-07
43	192	0.0232003	0.00879887	5.55595e-69
43	205	-0.0062163	0.00907586	3.69328e-07
43	206	-0.00586593	0.00881113	4.42553e-06
43	213	0.0152719	0.00915724	1.08133e-14
43	219	-0.00480812	0.00919037	0.0099298
43	232	-0.00524119	0.00919053	0.00087636
43	239	-0.00598479	0.00909688	3.19205e-07
43	240	-0.00530728	0.00889404	0.0003941
43	241	-0.00569204	0.00860231	1.25243e-05
43	243	-0.00816767	0.00900113	3.76943e-17
43	244	-0.00714991	0.00910346	2.53066e-11
43	245	0.018741	0.00859212	1.33969e-37
43	246	0.0141929	0.00877277	5.37096e-08
43	249	-0.0048548	0.00865845	0.00519638
43	255	-0.00600293	0.00880928	1.30219e-06
43	261	-0.00540338	0.00884624	0.00518473
43	270	0.0177835	0.00905846	3.81982e-28
43	271	0.0167285	0.00886948	6.38574e-22
43	276	0.0147506	0.00873823	1.09406e-10
43	279	0.0381786	0.00924855	9.40151e-148
43	280	0.0302685	0.00880574	4.6494e-114
43	282	0.0145967	0.00876771	7.17108e-10
43	285	-0.00834267	0.00879796	7.15095e-19
43	286	-0.00820452	0.00878096	4.55883e-18
43	287	-0.00521279	0.00893404	0.000778341
43	290	-0.00739044	0.00876716	2.54865e-13
43	294	-0.00473711	0.00901362	0.00264604
43	295	0.0251386	0.00865854	7.04044e-84
43	296	0.0261547	0.00830966	1.11083e-94
43	298	0.0129526	0.0081385	0.002032
43	301	-0.00652726	0.00833838	1.12907e-09
43	303	-0.00652663	0.00915569	2.41041e-08
43	305	0.030482	0.00878675	1.70109e-115
43	306	0.0326043	0.00838452	2.988e-132
43	310	0.0136334	0.00836266	3.82343e-06
43	312	0.0189955	0.00934593	6.0717e-35
43	318	0.0150448	0.00866229	2.17075e-12
43	319	0.0219137	0.00891437	1.0054e-58
43	320	0.0178784	0.00844064	4.78338e-32
43	328	-0.00546425	0.00911932	1.6675e-05
43	329	0.0183884	0.00890015	3.53063e-33
43	331	0.0371078	0.00893485	5.13015e-147
43	334	0.014041	0.00893974	2.44364e-08
43	337	0.0234841	0.00861283	8.09135e-73
43	340	-0.0280922	0.00193874	1.626018527299731e-332
44	1	0.0254842	0.00937002	2.4158e-74
44	2	0.0207353	0.00938268	7.69795e-42
44	4	-0.00417106	0.0088792	0.00544503
44	7	-0.00420806	0.00913141	0.0054541
44	21	-0.00574553	0.00934835	8.72549e-08
44	22	-0.00746901	0.00985479	6.81919e-15
44	25	-0.0052549	0.00953965	9.24183e-06
44	26	-0.00491471	0.00930897	7.88034e-05
44	29	0.0135724	0.00873699	0.00244914
44	30	0.0143546	0.00972012	5.03793e-05
44	35	-0.00743547	0.00895388	3.76606e-17
44	36	-0.00826939	0.0102437	4.54654e-18
44	39	0.023613	0.00828955	7.12737e-72
44	40	0.0202104	0.00910971	7.02432e-40
44	43	0.0355275	0.00952799	4.43317e-129
44	44	0.0277593	0.0106109	1.76705e-45
44	45	-0.00494263	0.00902262	3.95231e-05
44	47	0.0188633	0.00978345	2.74346e-27
44	48	0.020434	0.00917185	1.99385e-35
44	53	-0.00561395	0.0104096	3.32072e-06
44	59	0.0309813	0.00928126	1.58311e-108
44	60	0.0269207	0.009269	1.463e-84
44	61	0.0342861	0.00898896	1.7191e-129
44	62	0.029746	0.00959665	2.29882e-49
44	67	0.0241576	0.00895653	2.99895e-69
44	68	0.0230454	0.00954213	3.66138e-42
44	70	-0.00509074	0.00935087	2.29379e-05
44	72	-0.00513767	0.00949269	2.07889e-05
44	81	0.0151516	0.00896239	7.7607e-09
44	84	0.0180533	0.00992194	7.44632e-22
44	85	0.0147899	0.0085237	7.5371e-08
44	92	-0.00632245	0.00948997	4.63638e-10
44	93	-0.00557811	0.00970149	9.61994e-07
44	94	-0.00414799	0.00911281	0.00737491
44	100	-0.00569077	0.0098169	4.92102e-07
44	108	0.018907	0.0100607	2.12275e-26
44	109	0.0188254	0.00864896	2.31307e-30
44	126	0.0213573	0.00939097	4.19503e-46
44	127	0.0192466	0.0088231	1.07244e-34
44	128	0.0153769	0.00901199	8.53269e-10
44	131	0.0146784	0.00944525	2.48903e-06
44	143	-0.00693132	0.00968589	1.43866e-12
44	144	-0.00756423	0.00925004	5.08809e-17
44	149	-0.00597233	0.0093869	1.11724e-08
44	153	-0.00735336	0.00992903	1.71825e-14
44	158	-0.00426959	0.00928587	0.00444141
44	159	-0.00445162	0.00919289	0.00144769
44	161	-0.00431926	0.0100533	0.000483423
44	162	-0.0052048	0.00906377	1.21548e-05
44	163	-0.00791303	0.00968014	9.68428e-18
44	164	-0.00545708	0.00858468	1.48307e-07
44	181	0.0232024	0.00886954	2.72051e-63
44	182	0.0193465	0.0085941	1.47449e-31
44	187	0.0182139	0.00871293	6.81083e-28
44	188	0.016743	0.0093154	3.14106e-16
44	191	-0.00566504	0.0101191	3.57443e-07
44	192	0.0256869	0.00911735	4.30461e-78
44	203	0.0141457	0.00903623	7.51701e-05
44	205	-0.00565953	0.0090087	7.25982e-08
44	206	-0.00479973	0.0089287	9.92701e-05
44	213	0.016331	0.00904839	1.22492e-14
44	219	-0.00502095	0.00929293	3.50953e-05
44	232	-0.00756988	0.00949487	2.34025e-16
44	239	-0.00561098	0.0105798	6.63792e-07
44	240	-0.00523972	0.00944755	8.68024e-06
44	241	-0.00568977	0.00908863	6.89157e-08
44	243	-0.00790565	0.00919729	3.37112e-19
44	244	-0.00559379	0.00858722	3.69863e-08
44	245	0.0198923	0.00889583	6.07949e-39
44	246	0.0151363	0.00919878	1.999e-08
44	249	-0.00457141	0.00894686	0.000509514
44	253	0.0156394	0.00930452	1.58699e-10
44	255	-0.00504467	0.00947159	4.00259e-05
44	256	-0.00512142	0.00947465	2.27463e-05
44	261	-0.00557986	0.00814048	8.78924e-09
44	265	-0.00463609	0.0092465	0.000486063
44	267	0.0152623	0.00961097	2.1595e-08
44	270	0.0222748	0.0088388	7.68441e-57
44	271	0.0194976	0.00951259	1.15876e-32
44	276	0.0167204	0.00940187	7.23556e-16
44	277	-0.00487194	0.0090366	6.92187e-05
44	279	0.0413683	0.00933625	4.95469e-157
44	280	0.0332403	0.00950853	5.25025e-51
44	282	0.0162628	0.00997057	3.1888e-12
44	285	-0.00820457	0.00893437	5.17086e-22
44	286	-0.00805981	0.00952139	4.63351e-19
44	287	-0.00602482	0.00899745	1.66446e-09
44	290	-0.00877761	0.00935564	5.05064e-24
44	294	-0.00506505	0.00893397	1.26133e-05
44	295	0.0291029	0.00941072	2.18413e-96
44	296	0.0309207	0.00931168	7.55345e-108
44	301	-0.0084412	0.00905726	4.61756e-23
44	303	-0.00868609	0.00919961	4.53764e-24
44	305	0.0345875	0.00883644	6.33885e-133
44	306	0.0362977	0.00867396	2.12968e-143
44	309	-0.00570228	0.00946705	1.80996e-07
44	310	0.0153891	0.00860132	1.34659e-10
44	312	0.0195452	0.00960034	2.15661e-29
44	318	0.0164036	0.00912473	7.62211e-15
44	319	0.0224784	0.00863074	3.87909e-60
44	320	0.0187521	0.00973243	8.23714e-27
44	323	-0.00432551	0.00914574	0.00288968
44	328	-0.00562116	0.00887876	7.11411e-08
44	329	0.0225205	0.00860351	1.07759e-60
44	330	0.0147084	0.00890686	5.13513e-07
44	331	0.0394716	0.00900542	3.27932e-51
44	334	0.0201973	0.00908939	6.48302e-40
44	337	0.0243666	0.00915141	3.37198e-46
44	340	-0.0312986	0.00193961	1.390907218772987e-351
46	326	0.0103893	0.00767404	1.22534e-07
46	327	0.00937524	0.00659365	0.00375175
47	1	0.016485	0.00737181	9.99251e-45
47	2	0.0129085	0.00715143	1.04546e-15
47	22	-0.00760247	0.00728123	1.37534e-06
47	36	-0.0069324	0.0073259	0.000850048
47	43	0.0177217	0.00781608	1.2836e-39
47	44	0.0193618	0.00710479	6.02573e-73
47	48	0.0115459	0.00742352	5.12552e-07
47	59	0.0131674	0.00755276	1.93367e-16
47	61	0.0170861	0.007059	4.74662e-53
47	62	0.0152409	0.00717505	3.34764e-35
47	84	0.0137018	0.00739394	5.33726e-21
47	85	0.0114244	0.00780839	5.44277e-06
47	86	-0.00747045	0.00710711	3.48376e-06
47	87	-0.00830743	0.00705294	2.00725e-11
47	108	0.0110144	0.00723456	3.76158e-05
47	126	0.0145675	0.00753964	3.91252e-27
47	153	-0.00723275	0.00773985	0.000143784
47	181	0.0141502	0.00652298	9.07173e-30
47	182	0.0134933	0.00698556	3.10659e-21
47	192	0.0120641	0.0073552	2.37508e-09
47	208	-0.0102405	0.00759744	8.76265e-23
47	209	-0.00704586	0.00784582	0.000742146
47	235	-0.0067317	0.00816485	0.00229429
47	243	-0.00714554	0.00746811	6.33586e-05
47	277	-0.0086833	0.00747641	3.77518e-13
47	279	0.0175175	0.00756126	1.82652e-40
47	280	0.0149938	0.00732305	5.18612e-32
47	285	-0.00720594	0.0068718	5.34655e-06
47	287	-0.00680511	0.00714832	0.00178529
47	290	-0.00657231	0.00713936	0.00191133
47	295	0.0179628	0.00758044	1.06797e-55
47	296	0.0167036	0.00682665	8.17257e-52
47	303	-0.00870109	0.00792116	2.90908e-11
47	305	0.0210128	0.00729457	2.30269e-84
47	306	0.0208255	0.00748387	1.67241e-80
47	309	-0.00880112	0.00767596	1.79704e-12
47	318	0.0114708	0.00707838	3.85167e-07
47	329	0.0164342	0.00714173	9.52169e-38
47	330	0.0123923	0.00688187	3.3579e-13
47	331	0.0141102	0.00742027	2.30905e-23
47	338	-0.00780773	0.00706859	5.9296e-08
47	340	-0.0123908	0.00151547	3.05707e-51
48	1	0.0159131	0.00716945	1.5511e-39
48	2	0.0135669	0.00758098	6.39136e-18
48	36	-0.00662919	0.00741568	0.00216779
48	43	0.0181726	0.00783186	3.07074e-41
48	44	0.0201976	0.00758279	1.13795e-46
48	47	0.0114614	0.00799074	3.52081e-05
48	59	0.015469	0.00796672	3.3931e-27
48	60	0.0121594	0.00716624	1.03519e-09
48	61	0.017993	0.00751453	6.36141e-55
48	62	0.0156098	0.00704096	8.6555e-38
48	84	0.01242	0.00770583	4.35091e-10
48	87	-0.00651456	0.00772027	0.00640566
48	108	0.0110531	0.00812796	0.000227246
48	109	0.011495	0.00666821	7.21904e-07
48	126	0.0138242	0.00755837	9.58305e-20
48	181	0.0138764	0.00737671	3.65828e-20
48	182	0.0127001	0.00761886	6.43905e-12
48	192	0.0131951	0.0070501	4.56072e-17
48	243	-0.00646148	0.00752124	0.00248238
48	277	-0.00666761	0.00833706	0.00360538
48	279	0.0198791	0.00765296	2.43441e-69
48	280	0.0163883	0.0079546	8.84268e-38
48	285	-0.00653617	0.00733252	0.00325556
48	295	0.0177817	0.0076508	2.16169e-40
48	296	0.0173986	0.00741039	1.96084e-40
48	303	-0.00770345	0.00766136	4.04468e-09
48	305	0.0210753	0.00717743	1.70153e-47
48	306	0.0206695	0.00755772	9.81454e-48
48	329	0.0157544	0.00721177	8.86138e-38
48	330	0.0110541	0.00647089	6.22928e-05
48	331	0.0176798	0.00661534	1.20351e-61
48	340	-0.0139483	0.00141616	8.46291e-238
49	1	-0.00614013	0.00790724	0.00556991
49	2	-0.00626652	0.00835919	0.00342304
49	11	0.0117349	0.00863419	0.000346223
49	22	0.0114899	0.00896684	0.00250048
49	29	0.0230276	0.00803511	6.01805e-86
49	30	0.0225183	0.00805574	5.4461e-82
49	33	-0.0104883	0.00843899	2.95942e-25
49	34	-0.0088823	0.00875232	3.52458e-14
49	37	0.0128906	0.00869056	1.36587e-08
49	38	0.0120315	0.00784658	9.7548e-07
49	39	0.0228343	0.00804956	2.24594e-84
49	40	0.020087	0.00882943	2.12786e-56
49	50	0.0186772	0.00779846	1.90126e-54
49	58	-0.00613957	0.00842372	0.00858525
49	79	-0.00620104	0.00810315	0.00458656
49	82	-0.00806977	0.0083713	3.96568e-09
49	83	-0.00777951	0.00779452	3.88324e-10
49	84	-0.0101437	0.00850758	1.20087e-21
49	85	-0.00829575	0.00863062	6.3266e-11
49	86	0.0215385	0.00784966	6.00068e-77
49	87	0.0198805	0.00823414	4.34749e-60
49	97	0.0138703	0.00807237	2.57438e-15
49	102	0.0141729	0.0089302	1.03266e-14
49	103	0.0138966	0.00829981	8.19678e-15
49	116	-0.00917521	0.00825085	6.21215e-17
49	117	-0.00847668	0.00859948	6.03609e-12
49	120	-0.00816242	0.00794187	1.12301e-11
49	121	-0.0106917	0.00851863	2.50485e-26
49	122	0.0124673	0.00859682	7.19525e-07
49	123	0.0150521	0.00912658	2.66149e-19
49	126	-0.00671361	0.00878984	0.000346987
49	131	0.013267	0.00818505	1.9985e-11
49	132	0.0120191	0.00815578	1.53558e-05
49	138	-0.00603516	0.00837864	0.00349217
49	151	-0.00748906	0.00853761	1.00812e-06
49	155	0.0125857	0.00822828	5.05604e-07
49	156	0.0140403	0.00910189	4.20704e-14
49	174	-0.00886546	0.00798942	7.49299e-16
49	175	-0.00898228	0.0084386	2.98445e-15
49	182	-0.00614594	0.00763374	0.00413141
49	189	-0.00702662	0.00878024	3.27951e-05
49	198	-0.00638695	0.0083187	0.00175939
49	204	0.0235776	0.00816533	2.37025e-88
49	208	0.0268979	0.00809513	2.60155e-111
49	209	0.0226929	0.00903608	5.45712e-73
49	222	-0.00842873	0.00823112	1.58396e-12
49	223	-0.00633233	0.00798601	0.00173699
49	224	-0.00894325	0.00814385	6.8447e-16
49	225	0.014524	0.008773	1.65262e-12
49	226	0.0119249	0.00849314	6.61484e-05
49	233	0.0115327	0.00892223	0.00234736
49	235	0.0206135	0.00816195	1.79988e-66
49	236	0.0159619	0.00825072	2.72548e-29
49	237	-0.00808924	0.00869536	3.90863e-11
49	242	-0.00790223	0.00822348	1.12464e-09
49	244	0.0116293	0.0086982	0.000779514
49	262	-0.0112133	0.0087484	6.66717e-29
49	270	0.0118901	0.00790144	2.81629e-05
49	277	0.0190112	0.00883417	1.91752e-48
49	295	-0.0071282	0.00890057	6.42155e-06
49	298	-0.0063319	0.00793885	0.00164876
49	299	-0.00876818	0.00848369	7.41494e-14
49	302	-0.0089431	0.00769449	2.14935e-17
49	303	0.013562	0.00837424	1.19928e-12
49	309	0.0150428	0.0084113	6.77452e-22
49	310	0.01318	0.00804178	2.96029e-11
49	311	0.0110712	0.00844306	0.0044337
49	312	0.0124586	0.00882876	1.42558e-06
49	313	0.0185864	0.00830536	3.62848e-37
49	318	-0.00786114	0.00839287	3.58363e-09
49	322	0.0168853	0.00817393	1.90192e-33
49	324	-0.00783875	0.00821369	2.8682e-10
49	329	-0.0106543	0.0078981	2.8306e-29
49	330	-0.00840046	0.00856976	1.33494e-11
49	331	0.014612	0.00775357	1.31085e-21
49	333	-0.0125311	0.00799353	9.14504e-44
49	334	0.0121158	0.00855398	1.54444e-05
49	335	0.0138184	0.00974921	1.14452e-11
49	337	0.0327272	0.00751556	7.77287e-153
49	338	0.0321886	0.00857625	9.65674e-51
49	339	0.0158126	0.00820739	2.12081e-28
49	340	-0.0138966	0.00167375	4.00384e-222
50	29	0.0197043	0.00749172	2.51541e-70
50	30	0.0203096	0.00771881	1.04998e-72
50	33	-0.00904992	0.00787969	3.55951e-14
50	34	-0.00765898	0.00755709	4.77679e-07
50	37	0.013836	0.0080834	7.03751e-20
50	38	0.0120293	0.00759602	1.35612e-08
50	39	0.0211607	0.00815596	1.62721e-74
50	40	0.0174922	0.00777807	5.67262e-41
50	49	0.0193571	0.00797797	2.28745e-62
50	82	-0.00677029	0.0078449	0.00227246
50	83	-0.0074449	0.00803432	6.00541e-06
50	84	-0.00848705	0.00750119	1.18271e-13
50	85	-0.00866144	0.00745344	2.18978e-12
50	86	0.019979	0.00786839	1.90936e-68
50	87	0.0184036	0.00799519	1.59857e-54
50	97	0.0122037	0.00776629	3.27447e-09
50	102	0.0128975	0.00846213	1.52297e-11
50	103	0.0127134	0.0078872	8.32306e-12
50	116	-0.00855164	0.00715698	5.20196e-13
50	117	-0.00793167	0.00851266	4.93968e-07
50	120	-0.00731452	0.00818607	6.14052e-05
50	121	-0.00976105	0.00831293	2.22144e-17
50	122	0.0108103	0.00813727	0.0032912
50	123	0.0126347	0.00771081	9.22035e-12
50	131	0.012033	0.00795573	4.99329e-08
50	132	0.0113902	0.00785006	0.000126181
50	156	0.011591	0.00870805	2.56036e-05
50	175	-0.00649919	0.00755362	0.00976567
50	189	-0.00821502	0.00771793	1.24937e-09
50	204	0.0215703	0.00801265	1.84927e-48
50	208	0.0234455	0.00730033	2.80114e-50
50	209	0.0204209	0.0082287	4.28715e-44
50	222	-0.00667657	0.0080234	0.00119311
50	224	-0.00749223	0.00832699	1.7972e-05
50	225	0.012102	0.00796329	2.6316e-07
50	226	0.0112461	0.00752945	4.6903e-05
50	235	0.016856	0.00827918	1.51209e-32
50	236	0.0137854	0.00731972	4.54001e-21
50	237	-0.00684042	0.00841766	0.00116963
50	242	-0.00660604	0.0077502	0.00600768
50	262	-0.00881795	0.00798971	1.83061e-12
50	277	0.0163792	0.00851255	1.06588e-34
50	299	-0.00751865	0.00826741	1.25461e-05
50	303	0.0125154	0.00758002	2.32165e-11
50	309	0.0137042	0.00754989	1.30545e-18
50	310	0.0115866	0.00815156	1.30983e-06
50	312	0.0113615	0.00737874	1.10204e-05
50	313	0.0175465	0.00772402	3.30499e-37
50	322	0.0156405	0.00820965	6.99316e-31
50	324	-0.00822994	0.00774714	1.18017e-09
50	329	-0.0112657	0.00795877	8.53947e-30
50	330	-0.00983069	0.00758632	1.28866e-20
50	331	0.0147499	0.0076525	4.70621e-24
50	333	-0.0105611	0.00809322	9.16422e-24
50	337	0.029929	0.00722581	5.30842e-145
50	338	0.0285416	0.00788038	3.37306e-127
50	339	0.011045	0.00745326	0.000238042
50	340	-0.0121618	0.00164917	3.05707e-51
51	118	0.0139843	0.00732494	3.31031e-10
51	206	0.0125699	0.00707935	0.00258789
51	251	0.0140343	0.00740401	1.47452e-09
51	291	0.0172063	0.00810857	6.12877e-29
51	292	0.0169665	0.00733254	1.29359e-31
51	308	0.0124825	0.00697931	0.00435957
51	314	-0.00551375	0.00754013	5.05911e-06
51	323	0.0144962	0.00808624	9.79653e-11
51	330	0.0127799	0.00701424	0.000201974
51	336	0.0192912	0.00742557	2.79473e-40
51	339	0.0147404	0.00762295	1.27692e-13
51	340	-0.0128497	0.00153648	1.08487e-237
52	118	0.013288	0.0078981	9.92874e-08
52	205	0.0136508	0.00735993	2.60424e-09
52	206	0.0121426	0.00676729	0.00382658
52	251	0.0139396	0.00687518	2.9902e-12
52	291	0.0170517	0.0068343	5.64435e-39
52	292	0.0181004	0.0074825	4.29688e-35
52	323	0.0158937	0.00738964	5.10686e-25
52	336	0.016389	0.00713908	1.12694e-30
52	339	0.0149877	0.00756413	1.0713e-17
52	340	-0.0105063	0.00146335	2.7161e-201
53	208	0.0122454	0.0071459	8.59085e-19
53	209	0.00990596	0.00693621	0.000148088
53	235	0.00936321	0.00731235	0.00394946
53	277	0.0100285	0.00712512	7.77203e-05
53	295	-0.00772564	0.00673401	0.00192802
53	305	-0.00783277	0.0067113	0.000110768
53	306	-0.00806638	0.00686196	9.18941e-05
53	338	0.0140431	0.00682504	5.08376e-36
53	339	0.0110577	0.00648674	2.23954e-13
54	208	0.0105496	0.00665235	4.82449e-05
54	338	0.012572	0.00665231	3.68658e-16
54	339	0.0122355	0.00723722	2.07332e-12
55	334	0.00978624	0.00658054	1.08724e-06
55	336	0.0106658	0.00657277	2.74616e-11
57	214	0.0136726	0.00738906	5.44452e-21
57	215	0.0115401	0.00677901	3.37996e-08
57	260	0.011127	0.00731402	2.14154e-05
57	291	0.0125085	0.00730818	2.21768e-13
57	292	0.0121407	0.00727674	1.00759e-10
57	326	0.0153782	0.007262	4.34945e-36
57	327	0.0126633	0.00761779	4.14486e-13
58	8	0.0104763	0.00726931	0.00247379
58	29	-0.00761058	0.00736414	5.67462e-06
58	117	0.0111279	0.00768633	0.000115798
58	134	0.010894	0.00736012	9.47568e-05
58	147	0.0104564	0.00755381	0.00389203
58	148	0.0111389	0.00759873	4.11356e-06
58	151	0.0119562	0.00776901	5.24236e-09
58	152	0.0109541	0.00779603	0.000127462
58	176	0.0106455	0.00676892	0.000294464
58	177	0.0115716	0.00722475	5.16088e-09
58	208	-0.00680267	0.00708145	0.00402994
58	214	0.0165989	0.00733516	6.34697e-37
58	215	0.0152591	0.00744099	1.59432e-34
58	217	0.0130491	0.00709136	2.38924e-17
58	218	0.0105661	0.00704314	0.000919277
58	257	0.0113149	0.00748888	2.09895e-06
58	259	0.0141612	0.00725404	2.29998e-26
58	260	0.0165999	0.00717325	1.37181e-48
58	262	0.0107188	0.00727209	0.00037211
58	273	-0.00693169	0.00693625	0.000666037
58	291	0.0118769	0.00753602	3.73723e-09
58	292	0.0110179	0.00691717	1.0103e-05
58	293	0.0113387	0.00712085	5.17687e-07
58	294	0.0106706	0.00700246	6.74584e-06
58	302	0.0118768	0.00734107	1.5638e-09
58	326	0.0185121	0.00715757	5.4594e-45
58	327	0.0150208	0.00722161	5.6528e-34
58	332	0.0115369	0.00732538	9.53235e-07
58	333	0.0123719	0.00760846	7.44291e-12
58	334	-0.0115934	0.00705425	1.585e-36
58	335	-0.00834758	0.00771055	9.46966e-10
58	338	-0.0069925	0.00709493	0.000973766
59	1	0.0172653	0.00756503	4.79336e-31
59	2	0.0133654	0.00844461	5.42969e-08
59	29	0.0129553	0.00841843	8.09023e-06
59	30	0.0154392	0.00839175	2.95767e-19
59	35	-0.00579269	0.00833218	0.000437176
59	36	-0.00532006	0.00861253	0.00482865
59	39	0.0214173	0.00809844	6.87681e-44
59	40	0.0187288	0.0081937	5.06755e-45
59	43	0.0267584	0.00843339	3.11767e-49
59	44	0.0304555	0.00832007	1.04121e-124
59	48	0.0153115	0.00870723	1.05308e-17
59	59	0.0119236	0.00964669	8.27258e-05
59	60	0.0209825	0.00812598	2.43253e-44
59	61	0.0248254	0.00870569	2.26455e-85
59	62	0.0220533	0.008953	9.46632e-64
59	67	0.0191948	0.00791226	4.22339e-51
59	68	0.0188726	0.00841019	1.61751e-44
59	81	0.0124827	0.00814826	0.000245459
59	92	-0.00578065	0.00828403	0.000445831
59	108	0.0129685	0.00825755	3.46598e-07
59	109	0.0133583	0.00822833	3.62479e-08
59	126	0.0147819	0.00869167	2.95045e-14
59	127	0.0149839	0.00829568	1.26475e-16
59	131	0.0138633	0.00794748	7.26121e-11
59	143	-0.00614767	0.00856558	4.18755e-05
59	144	-0.0070148	0.00808252	1.78216e-09
59	181	0.0168406	0.00861477	5.5073e-28
59	182	0.0132766	0.00740274	1.18115e-08
59	187	0.0138166	0.00823982	5.65166e-10
59	188	0.0130187	0.00872081	9.0509e-06
59	192	0.0198111	0.00823012	2.5848e-53
59	213	0.0137317	0.00807968	8.9912e-12
59	232	-0.00579312	0.00875118	0.000259914
59	239	-0.00535934	0.00852695	0.00839023
59	240	-0.00608971	0.00860612	7.14617e-05
59	245	0.0151124	0.00781427	3.44203e-19
59	261	-0.00534561	0.00844074	0.00847184
59	270	0.0181346	0.00869895	3.58207e-33
59	271	0.0152135	0.00844766	1.35841e-17
59	279	0.0318595	0.00775565	2.29173e-140
59	280	0.0266852	0.00847209	1.58938e-50
59	285	-0.00688285	0.00816065	1.12207e-08
59	286	-0.00615984	0.00811207	1.2803e-06
59	290	-0.00693352	0.00789887	2.18476e-09
59	294	-0.00603924	0.00856453	9.85645e-05
59	295	0.0201085	0.00834116	1.10287e-54
59	296	0.023187	0.00789539	7.03875e-83
59	301	-0.00587448	0.00845661	0.00028793
59	305	0.0251494	0.00827199	1.87284e-92
59	306	0.0266177	0.00863903	1.24826e-49
59	310	0.0131677	0.00847132	1.31117e-06
59	312	0.0170423	0.00861592	9.59587e-27
59	319	0.0181426	0.0080281	1.46333e-41
59	320	0.0146242	0.00816343	9.13548e-15
59	328	-0.0058028	0.00795894	0.000230486
59	329	0.0145272	0.00837402	9.82511e-11
59	331	0.0310611	0.00822436	2.32013e-129
59	334	0.0185512	0.00862663	1.57282e-40
59	337	0.0225515	0.00831446	1.61768e-73
59	340	-0.023937	0.00168413	3.05707e-51
60	1	0.013821	0.00804634	5.15892e-12
60	3	-0.0056917	0.00786756	0.00373115
60	25	-0.00572669	0.00869817	0.00216859
60	29	0.0144645	0.00814733	2.42002e-14
60	30	0.015884	0.00769373	8.05088e-28
60	39	0.0222432	0.00785787	2.20471e-78
60	40	0.0200501	0.00794462	3.6057e-60
60	43	0.0250488	0.00826604	7.90653e-94
60	44	0.0268976	0.00794408	1.41038e-50
60	48	0.0125764	0.00769707	3.11602e-06
60	59	0.0217531	0.00814292	1.60745e-71
60	61	0.0222226	0.00824645	5.80419e-74
60	62	0.0195315	0.00781908	3.86333e-57
60	67	0.0185596	0.00772565	7.06464e-50
60	68	0.0169602	0.008258	5.40798e-33
60	81	0.012496	0.00839821	3.25599e-05
60	94	-0.00586667	0.00775122	0.000975497
60	127	0.0131539	0.00823904	1.0988e-08
60	131	0.0133954	0.00826078	2.78621e-09
60	144	-0.00579328	0.00824757	0.00286387
60	181	0.0147238	0.00811954	2.03437e-17
60	192	0.0181074	0.00730606	9.85829e-50
60	204	0.012318	0.00851043	0.000163609
60	213	0.0136033	0.00853046	7.62781e-10
60	240	-0.00600931	0.00849448	0.000921115
60	245	0.0152137	0.00759672	4.73853e-23
60	253	0.0117571	0.00772068	0.0031743
60	270	0.0173241	0.00779417	5.84884e-39
60	271	0.0147771	0.00846554	1.25091e-16
60	279	0.0306207	0.0075171	1.11704e-138
60	280	0.0251604	0.00862408	1.91628e-90
60	286	-0.0057841	0.00873424	0.00475805
60	291	-0.00574241	0.00869089	0.00580022
60	295	0.015938	0.00821365	1.53306e-25
60	296	0.0193695	0.00739931	2.02443e-43
60	305	0.0206826	0.0082479	3.19582e-42
60	306	0.0226973	0.00788152	1.46049e-81
60	310	0.0134396	0.00850677	1.68762e-09
60	312	0.0172792	0.00786147	4.15723e-38
60	319	0.0175259	0.00813025	2.05836e-32
60	320	0.0144099	0.00870735	9.15393e-14
60	322	0.0123596	0.00854526	0.000126159
60	331	0.0305291	0.00800068	4.56394e-51
60	334	0.014039	0.00823832	1.46665e-12
60	337	0.0262086	0.00774928	3.54435e-108
60	340	-0.0226276	0.00184213	2.20931e-300
61	1	0.0229696	0.00862867	7.61006e-70
61	2	0.0192	0.00856685	3.66998e-42
61	21	-0.00739539	0.00905933	4.91551e-12
61	22	-0.0079617	0.00881064	9.04585e-16
61	35	-0.00757939	0.00900348	4.00816e-13
61	36	-0.00787399	0.00870512	1.49059e-15
61	39	0.017037	0.00770897	9.73263e-31
61	40	0.014223	0.00866034	7.48698e-09
61	43	0.0301706	0.00836952	1.13932e-119
61	44	0.0341474	0.0085654	2.09442e-138
61	47	0.0165879	0.00890138	1.11264e-21
61	48	0.0177981	0.00860011	1.83244e-31
61	53	-0.00619231	0.00894226	9.92526e-07
61	59	0.0255536	0.00864825	1.31133e-87
61	60	0.022087	0.00894361	2.36712e-43
61	61	0.0171684	0.00984016	4.65372e-21
61	62	0.0263622	0.00929965	5.80754e-86
61	67	0.0188917	0.00883134	4.14693e-38
61	68	0.0186664	0.00892422	6.57556e-36
61	72	-0.00522454	0.00902914	0.00172901
61	84	0.0175711	0.00876839	6.07603e-29
61	85	0.0144026	0.0081248	9.99086e-11
61	87	-0.00580405	0.00868113	1.6103e-05
61	92	-0.00529327	0.00875908	0.000829864
61	108	0.0162436	0.00886764	1.32483e-19
61	109	0.0160449	0.00849642	1.17865e-19
61	126	0.0208987	0.00847282	7.01938e-56
61	127	0.0165228	0.00907516	1.27549e-20
61	128	0.0127181	0.00873327	0.00281454
61	143	-0.00522538	0.00887036	0.000434215
61	144	-0.00652047	0.00887451	3.53169e-08
61	149	-0.00597784	0.00859303	1.73823e-07
61	153	-0.00762516	0.00847801	1.03214e-14
61	155	-0.00504938	0.00861245	0.00327945
61	162	-0.00526571	0.00856609	0.00078726
61	163	-0.00799382	0.00935604	1.21133e-14
61	164	-0.00577717	0.00842418	1.18123e-05
61	181	0.021175	0.00869368	4.96333e-40
61	182	0.0188818	0.00851763	4.42622e-40
61	187	0.0153401	0.00877623	1.92806e-14
61	188	0.0139211	0.00887993	3.17996e-07
61	191	-0.00516267	0.00900867	0.00244704
61	192	0.0207105	0.00834352	1.48435e-55
61	205	-0.00610702	0.00865453	1.03725e-06
61	206	-0.00491038	0.00856724	0.00701385
61	208	-0.00561423	0.00759934	7.87052e-06
61	213	0.0133907	0.00819683	7.77847e-06
61	236	-0.00538588	0.0089756	0.000587892
61	241	-0.00526192	0.00925012	0.00173123
61	243	-0.00849608	0.00838297	1.38982e-20
61	244	-0.00709543	0.00800298	8.16716e-13
61	245	0.01662	0.00858584	3.64278e-23
61	246	0.0127374	0.00814097	0.00131767
61	255	-0.00533454	0.00888055	0.000732987
61	265	-0.00549582	0.00823038	8.62406e-05
61	267	0.0138279	0.00898411	9.91206e-07
61	270	0.0157541	0.00847118	7.41229e-18
61	271	0.0150163	0.00945205	3.70253e-13
61	276	0.0154781	0.00894867	8.99403e-15
61	277	-0.00760397	0.00855815	1.27313e-06
61	279	0.0353564	0.00869732	1.46729e-142
61	280	0.0280928	0.00827639	2.05739e-108
61	282	0.0140502	0.00875312	6.19398e-08
61	285	-0.00845438	0.00827163	9.78956e-21
61	286	-0.00670494	0.00943288	3.32743e-08
61	287	-0.00722431	0.00895402	2.23117e-11
61	290	-0.00781693	0.00848263	7.39305e-16
61	295	0.026838	0.00862342	2.74465e-96
61	296	0.0269395	0.00805889	8.59981e-104
61	301	-0.00636866	0.00912202	3.17555e-07
61	303	-0.00938217	0.00844043	1.5517e-26
61	305	0.0313176	0.00886402	7.55768e-120
61	306	0.0326488	0.00831963	5.20804e-134
61	309	-0.00642746	0.00845692	2.30034e-08
61	312	0.0150792	0.00834747	4.65165e-14
61	318	0.0165463	0.00833624	9.80288e-24
61	319	0.0201385	0.00805197	1.35706e-53
61	320	0.0168325	0.00888628	2.42103e-23
61	328	-0.00536013	0.00870236	0.0004923
61	329	0.0204545	0.00818586	6.19744e-55
61	330	0.0141016	0.00851889	3.38544e-09
61	331	0.0324821	0.00809073	2.80629e-136
61	334	0.0151911	0.00842223	1.60111e-14
61	337	0.0157406	0.008302	2.3827e-18
61	340	-0.0257097	0.00189421	1.286518004198858e-321
62	1	0.0208114	0.00813895	8.16818e-63
62	2	0.016648	0.00739356	1.89505e-34
62	21	-0.00561257	0.00774567	0.00152173
62	22	-0.00743651	0.00793606	8.49351e-11
62	35	-0.0066798	0.00856999	9.61196e-07
62	36	-0.00812039	0.0078968	7.36444e-16
62	39	0.0135448	0.00861337	1.6534e-08
62	40	0.0133908	0.0083187	3.09273e-08
62	43	0.0255312	0.00817847	7.60577e-97
62	44	0.029222	0.00737326	1.55023e-131
62	47	0.0139782	0.00833108	3.47981e-11
62	48	0.0152413	0.00815448	1.74097e-19
62	59	0.0222027	0.00870028	7.23546e-68
62	60	0.0190458	0.0082772	1.10658e-47
62	61	0.0256026	0.00828675	5.13549e-96
62	67	0.0165119	0.00823411	2.85252e-28
62	68	0.0150525	0.00816336	3.54757e-18
62	84	0.0151747	0.00808366	2.68848e-19
62	85	0.0130976	0.00807002	3.08969e-07
62	108	0.0139603	0.00896628	6.95745e-10
62	109	0.0147877	0.00763532	1.05912e-17
62	126	0.0178064	0.0088924	3.83043e-34
62	127	0.0149573	0.00775399	4.85712e-19
62	128	0.0123521	0.00860044	0.000580838
62	143	-0.00511659	0.00829867	0.00031711
62	144	-0.00597372	0.00713546	2.45587e-05
62	153	-0.00665546	0.00805408	2.79336e-07
62	163	-0.00606047	0.00794618	6.21268e-05
62	164	-0.00529256	0.00726451	0.00800123
62	181	0.017968	0.00753118	7.63529e-45
62	182	0.0157283	0.00795986	2.88403e-22
62	187	0.0138725	0.00801935	2.82559e-11
62	188	0.011898	0.0080134	0.00582111
62	192	0.0188328	0.00788579	3.54963e-49
62	232	-0.00548264	0.00850699	0.00731283
62	243	-0.00701395	0.00837719	1.77379e-08
62	244	-0.00542231	0.00757963	0.00464199
62	245	0.0137728	0.00836704	3.46266e-12
62	270	0.0149001	0.00800808	1.05746e-17
62	271	0.0127117	0.00879842	5.62799e-05
62	276	0.0124804	0.00861537	0.00023874
62	277	-0.00573864	0.00832264	0.00019301
62	279	0.0294293	0.00845581	1.11986e-117
62	280	0.0246869	0.00841372	6.76655e-50
62	282	0.0124475	0.00863487	0.000311494
62	285	-0.00732048	0.00769429	2.8467e-12
62	286	-0.0066072	0.00818197	6.70047e-07
62	287	-0.0067604	0.00837056	3.65499e-06
62	290	-0.00768022	0.00780503	2.59559e-13
62	295	0.0232408	0.00801043	1.01102e-68
62	296	0.0233589	0.00745464	6.37836e-49
62	301	-0.00662282	0.00796567	2.99304e-07
62	303	-0.00852625	0.00810456	7.43767e-18
62	305	0.0274171	0.00795822	8.39757e-51
62	306	0.0282967	0.00776018	4.94436e-51
62	309	-0.00681094	0.00837493	1.5066e-07
62	312	0.0124969	0.00731984	1.79146e-05
62	318	0.0133232	0.00842637	4.67878e-09
62	319	0.0157207	0.00730484	4.11054e-27
62	320	0.0146269	0.0084899	1.76279e-14
62	328	-0.00639119	0.00730054	4.50609e-07
62	329	0.0183193	0.00812791	4.66194e-43
62	330	0.0123557	0.0078147	0.00017456
62	331	0.025844	0.00679778	2.8657e-118
62	334	0.0147665	0.00843337	1.77171e-15
62	337	0.014161	0.00796113	4.19852e-13
62	340	-0.0216287	0.00187389	4.90909e-91
63	20	0.0106921	0.00744858	6.4707e-06
63	118	0.0117955	0.0077012	6.12248e-13
63	168	0.0107287	0.00754778	5.78497e-06
63	189	0.0105314	0.00735005	2.16204e-05
63	194	-0.00763426	0.00778573	6.85152e-05
63	195	-0.00841558	0.00739344	2.31294e-07
63	251	0.0104835	0.00719083	6.7964e-05
63	257	-0.0075246	0.00690977	0.000576143
63	260	-0.00784918	0.00714005	4.6192e-05
63	266	-0.0100236	0.00785698	9.42376e-16
63	273	0.0114548	0.00797881	7.83851e-10
63	274	0.010414	0.00740359	1.45402e-05
63	291	0.0113961	0.00739693	6.29862e-09
63	292	0.0106067	0.00739938	1.34344e-05
63	298	-0.00724403	0.00688648	0.00506881
63	300	0.010486	0.00711991	1.39155e-05
63	302	-0.00744382	0.00687926	0.00108321
63	308	0.0123439	0.00723079	3.83066e-16
63	314	-0.0105041	0.00769513	4.11047e-20
63	317	0.010008	0.00744208	0.00236067
63	319	-0.00772733	0.0069138	9.89442e-05
63	330	0.0121905	0.00711805	3.41649e-15
63	331	-0.00819562	0.00689148	5.45192e-07
63	332	-0.0120841	0.00701228	3.25616e-31
63	334	0.0116946	0.00716301	6.76542e-12
63	336	0.0178359	0.00736597	3.91241e-62
63	339	0.0126935	0.00762969	1.04707e-17
64	331	-0.00805916	0.00678603	5.4271e-05
64	332	-0.00760333	0.00733197	0.00117482
64	336	0.0118358	0.00683869	8.77457e-17
65	279	0.011307	0.00670246	5.53333e-13
65	319	0.0093877	0.00660256	0.00680303
65	331	0.0132122	0.0068355	2.0969e-25
65	332	0.0102947	0.00693867	3.52064e-06
65	336	-0.00837873	0.00685628	9.31479e-07
65	337	0.0132751	0.00682836	1.17079e-28
65	340	-0.00869498	0.00144847	4.60389e-77
66	279	0.01001	0.0063632	8.58932e-07
66	331	0.0118495	0.00655193	1.31488e-19
66	337	0.0106836	0.00681445	6.29802e-10
66	340	-0.00720858	0.00140089	1.3833e-07
67	29	0.0151382	0.00838934	1.94269e-19
67	30	0.017585	0.0076336	1.15716e-42
67	39	0.022683	0.00773049	3.9821e-66
67	40	0.0194478	0.00800285	4.38649e-40
67	43	0.0213195	0.00834213	1.26695e-44
67	44	0.0239216	0.00800203	2.21847e-89
67	59	0.0192862	0.00772473	2.76356e-56
67	60	0.0183344	0.00769825	1.67094e-48
67	61	0.0191128	0.00749722	5.06398e-57
67	62	0.016404	0.00770399	2.99064e-32
67	68	0.015916	0.00872461	2.48167e-23
67	94	-0.00589983	0.00807709	0.00148111
67	95	-0.00575529	0.00829701	0.00468642
67	131	0.0136226	0.00789995	1.73867e-12
67	158	-0.00578438	0.00792524	0.00271056
67	181	0.0118939	0.0072145	0.000451539
67	189	-0.00571137	0.00748818	0.00275473
[truncated: 9,471 more rows]
